# Supplementary material
Source: PubMed Central journal article supplement (PMC3612983)
Supplement: NIHMS215304-supplement-1.pdf [file NIHMS215304-supplement-1.pdf]

## **SUPPLEMENTARY ONLINE MATERIAL**

**LIU *et al.***, Meta-analysis and imputation refines the association of 15q25 with smoking quantity

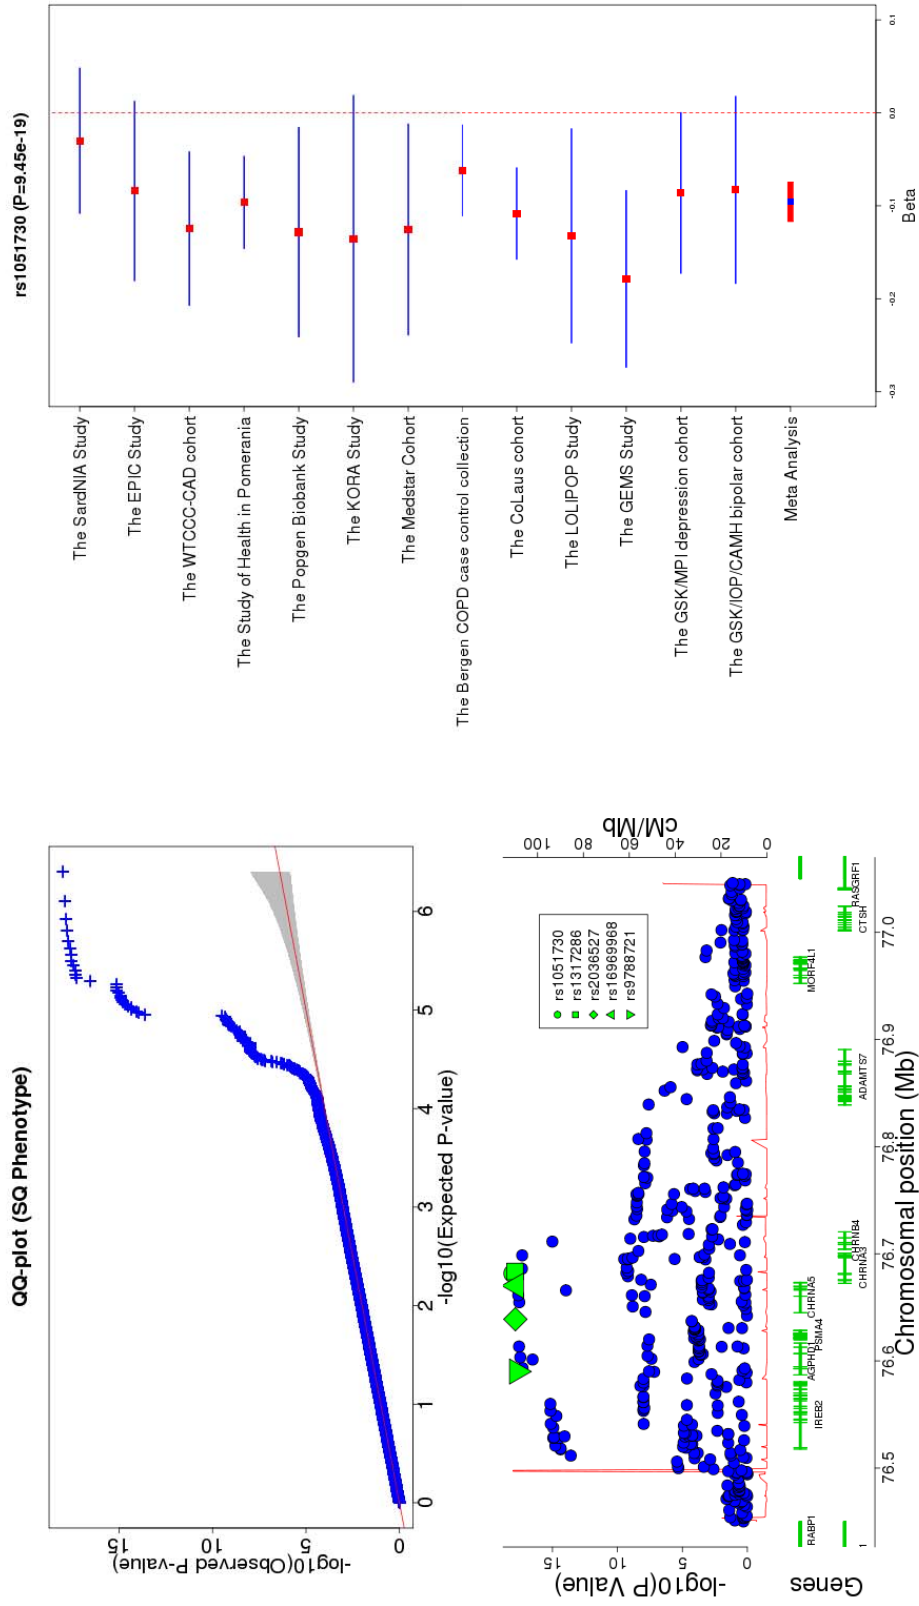

**Supplementary Figure 1.** Results from Smoking Quantity genome scan relating to 15q25. **Top left:** QQ plot showing significance of association of all SNPs in the genome-wide SQ meta-analysis versus that expected under the null hypothesis **Bottom left:** Chromosome 15q25 signal plot based on HapMap imputation and association meta-analysis of SQ. SNPs are plotted on the x-axis by their positions on the chromosome, against association ( $-\log_{10}$  p-value) with SQ on the left y-axis. The five SNPs with the lowest p-values are highlighted in green and their rs identifiers are given in the box. Recombination rates across the region are shown by the red line plotted against the right y-axis. Genes and their positions are shown at the bottom (using data from the UCSC genome browser, genome.ucsc.edu). **Right:** Forest plot showing by-cohort evidence of association with SQ at SNP rs1051730. Point estimates of beta for the G allele together with the 95% confidence interval (CI) are shown for each cohort. The meta-analysis estimate with its 95% CI is shown at the bottom of the plot.

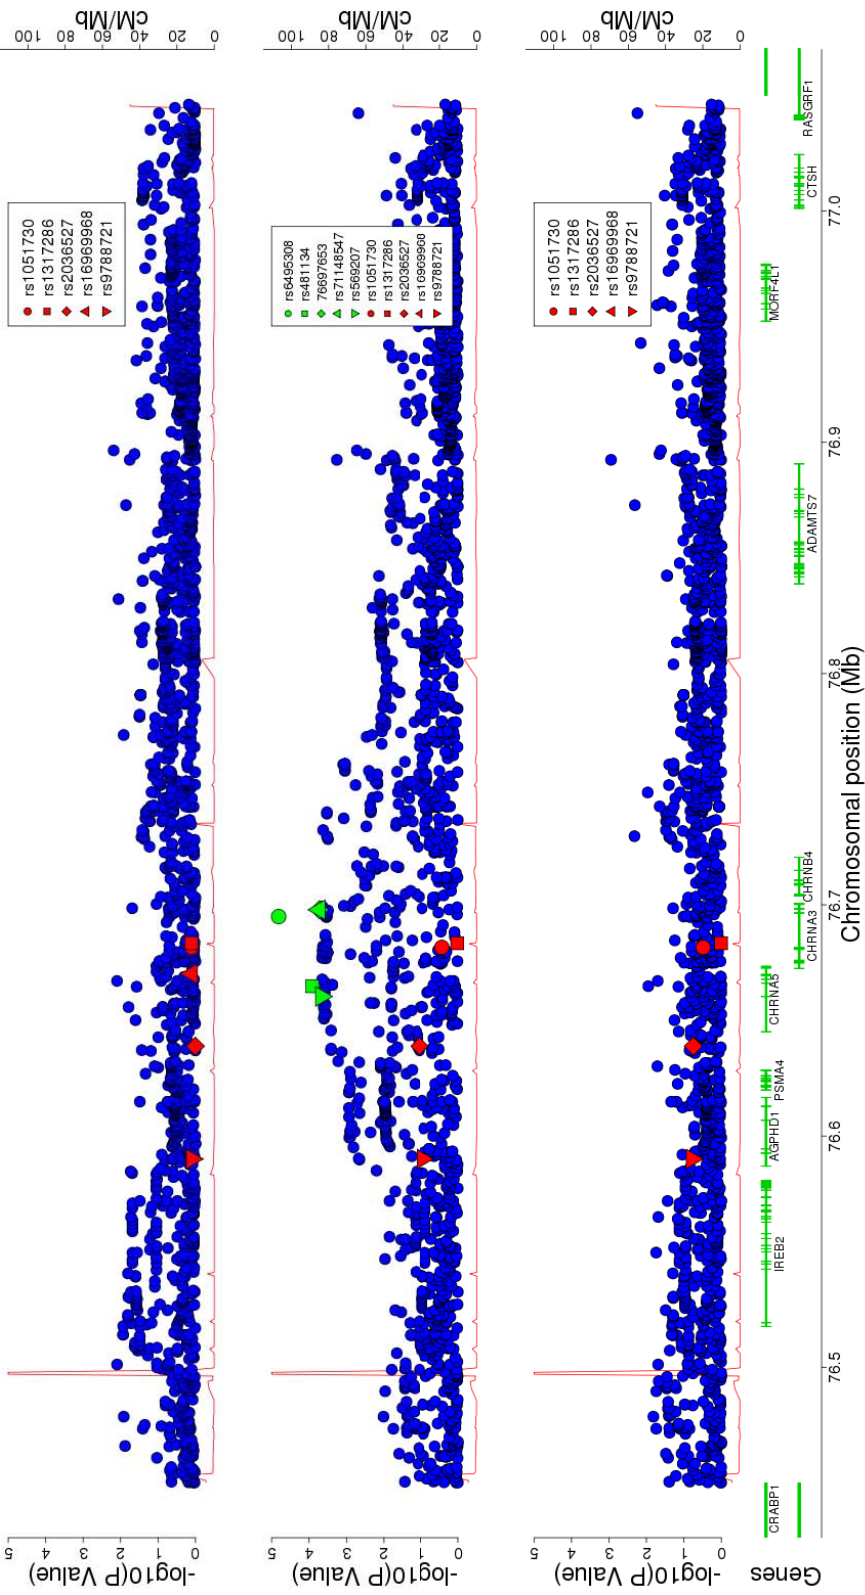

**Supplementary Figure 2.** Conditional analysis of 15q25. **Top:** Chromosome 15q25 signal plot based on 1000 Genomes imputation and meta-analysis of SQ, conditional on SNPs rs55853698 and rs6495308. SNPs are plotted on the x-axis by their positions on the chromosome, against association with SQ on the left y-axis ( $-\log_{10}$  p-value). The five SNPs with the lowest p-values from the unconditional HapMap-imputation analysis are highlighted in red. The rs identities of highlighted SNPs are given in the box. Recombination rates across the region are shown by the red line plotted against the right y-axis. Genes and the position of exons are shown at the bottom (using data from the UCSC genome browser). **Middle:** Chromosome 15q25 signal plot based on 1000 Genomes imputation and meta-analysis of SQ association, conditional on SNP rs16969968. The five SNPs with the lowest p-values from the conditional analysis are highlighted in green. The five SNPs with the lowest p-values from the unconditional HapMap-imputation analysis are highlighted in red. **Bottom:** Chromosome 15q25 signal plot based on 1000 Genomes imputation and meta-analysis of association with SQ, conditional on rs16969968 and rs588765. The five SNPs with the lowest p-values from the unconditional HapMap-imputation analysis are highlighted in red.

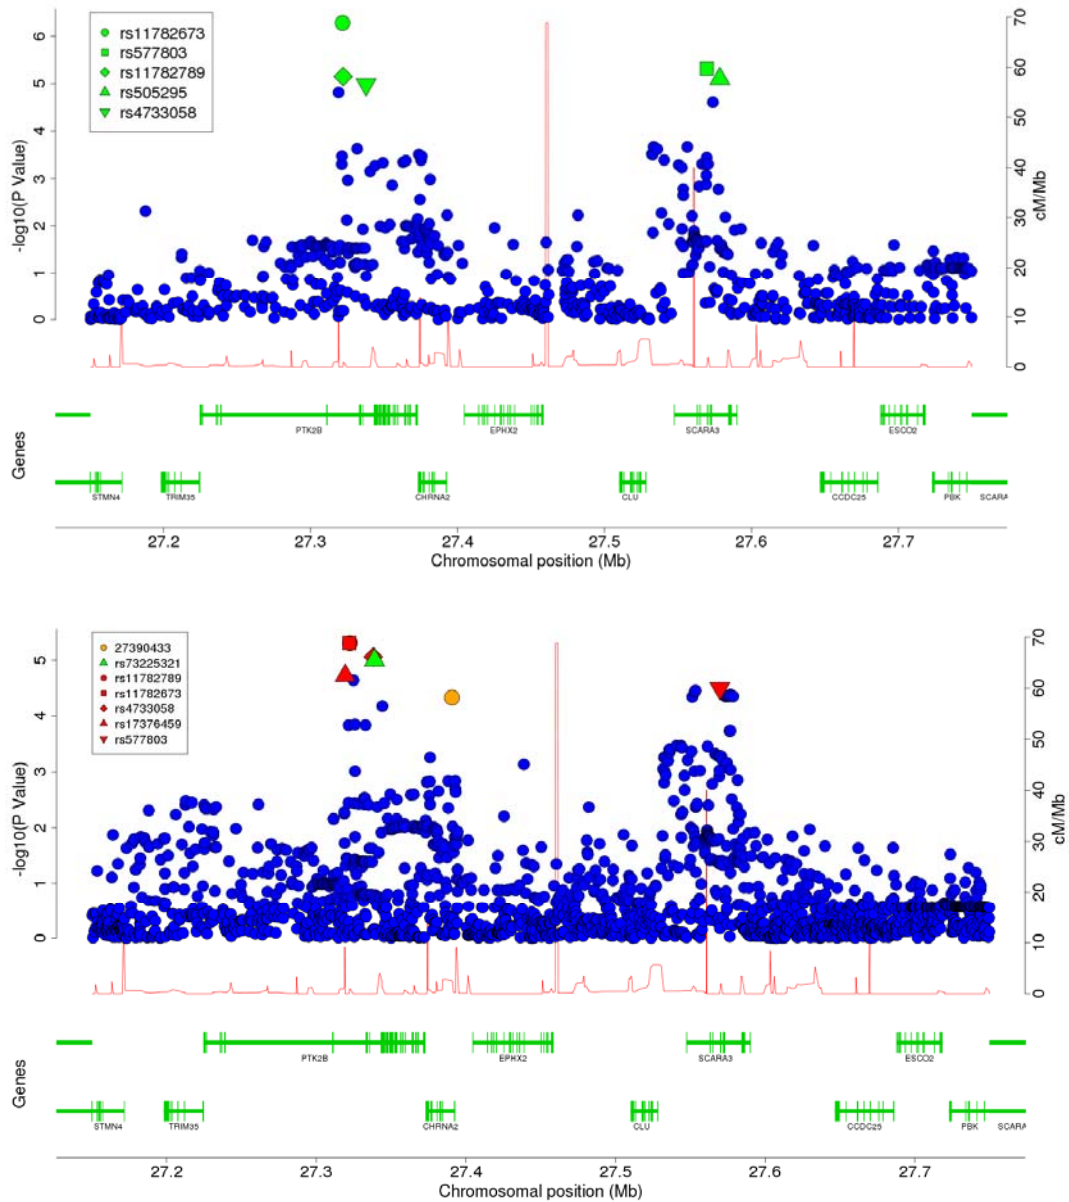

**Supplementary Figure 3.** Association signal on 8q21. **Top:** Chromosome 8q21 signal plot based on HapMap imputation and meta-analysis of association with SQ. SNPs are plotted on the x-axis by their positions on the chromosome, against association with SQ on the left y-axis ( $-\log_{10}$  p-value). The five SNPs with the lowest p-values are highlighted in green and their rs identities are given in the box. Recombination rates across the region are shown by the red line plotted against the right y-axis. Genes and the position of exons are shown below (using data from the UCSC genome browser, genome.ucsc.edu). **Bottom:** Chromosome 8q21 signal plot based on 1000 Genomes imputation and meta-analysis of SQ association. The five SNPs with the lowest p-values from the HapMap imputation are highlighted in red. The five SNPs with the lowest p-values from 1000 Genomes imputation are highlighted in red (unless already colored red). A novel CHRNA2 SNP at position 27390433 is highlighted in yellow.

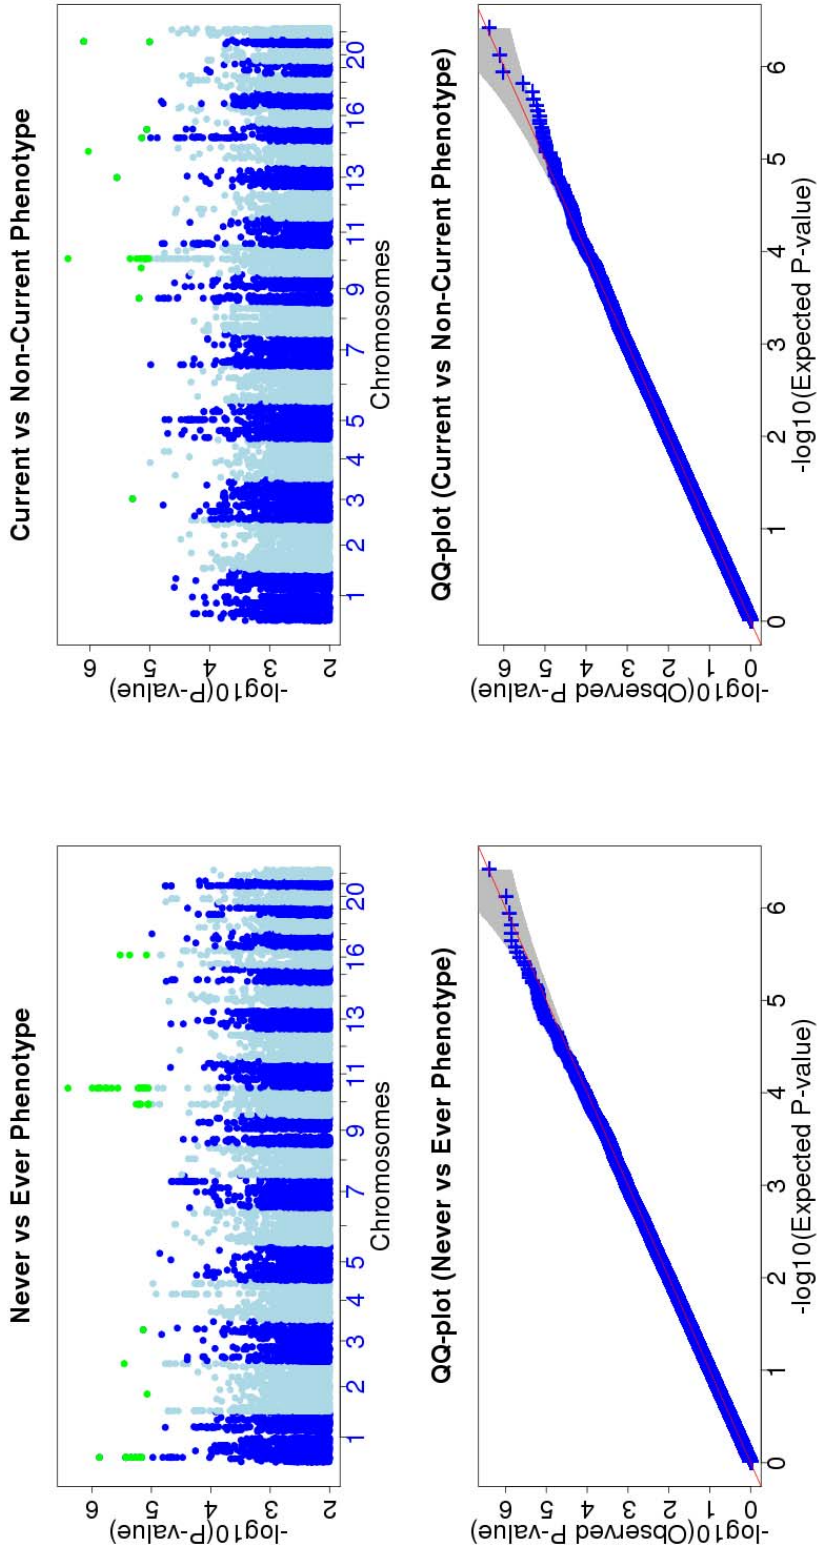

**Supplementary Figure 4.** Analysis of Ever/Never and Current/Non-current. **Top left:** Manhattan plot showing significance of association of all SNPs in the EVER/NEVER genome-wide meta-analysis. SNPs are plotted on the x-axis according to their positions on each chromosome, against association with EVER/NEVER status on the y-axis ( $-\log_{10}$  P-value). SNPs with p-values less than  $1.0E-05$  are highlighted in green. **Bottom left:** QQ plot showing significance of association of all SNPs in the Ever/Never genome-wide meta-analysis versus that expected under the null hypothesis. **Top right:** Manhattan plot showing significance of association of all SNPs in the Current/Non-Current genome-wide meta-analysis. **Bottom right:** QQ plot showing significance of association of all SNPs in the Current/Non-Current genome-wide meta-analysis versus that expected under the null hypothesis.

Supplementary Table 1. Information on study cohorts used in meta-analysis (Table covers 2 pages).

| Study Name                                            | Other Name   | Description                          | Platform              | Genotype calling algorithm | SNP QC exclusions                                                                                                                         | Sample QC exclusions                                                                                                                                                                                   | Post QC      |          |
|-------------------------------------------------------|--------------|--------------------------------------|-----------------------|----------------------------|-------------------------------------------------------------------------------------------------------------------------------------------|--------------------------------------------------------------------------------------------------------------------------------------------------------------------------------------------------------|--------------|----------|
|                                                       |              |                                      |                       |                            |                                                                                                                                           |                                                                                                                                                                                                        | #SNPs        | #samples |
| The arc Epidemiology Unit Rheumatoid Arthritis cohort | WTCCC-RA     | Rheumatoid Arthritis cases           | Affymetrix 500K       | CHIAMO                     | HWE pval $\leq 5.7e-7$ , Call Rate $\leq 95\%$ , MAF $< 5\%$                                                                              | Call rate: $<97\%$ , Heterozygosity $>.3$ and $<.23$ , Samples with non-European ancestry, duplicated or closely related removed.                                                                      | 488756       | 1860     |
| The EPIC Obesity study                                | EPIC         | Obesity case-control                 | Affymetrix 500K       | BRLMM                      | HWE pval $\leq 1e-6$ , Call Rate $\leq 90\%$ , MAF $< 1\%$                                                                                | Call rate: $<94\%$ , Heterozygosity $>.3$ and $<.23$ , Samples with non-European ancestry, duplicated or closely related removed. Samples with $>5\%$ discordance at SNP pairs with $R^2=1$ in HapMap. | 377149       | 3516     |
| The BRIGHT study                                      | WTCCC-HT     | Hypertension cases                   | Affymetrix 500K       | CHIAMO                     | HWE pval $\leq 5.7e-7$ , Call Rate $\leq 95\%$ , MAF $< 5\%$                                                                              | Call rate: $<97\%$ , Heterozygosity $>.3$ and $<.23$ , Samples with non-European ancestry, duplicated or closely related removed.                                                                      | 488756       | 1952     |
| The GEMS Study                                        | GEMS         | Dyslipidemia case-control            | Affymetrix 500K       | BRLMM                      | HWE pval $\leq 1e-4$ , Call Rate $\leq 95\%$ , MAF = $0\%$                                                                                | Call rate: $<95\%$ , Sex inconsistencies removed                                                                                                                                                       | 475348       | 1847     |
| The Bergen COPD case control collection               | GSK-COPD     | COPD case-control                    | Illumina HumanHap 550 | BeadStudio                 | Call Rate $\leq 95\%$ , MAF $<0.15\%$                                                                                                     | male X-chromosome homozygosity $>0.8$ , female X-chromosome homozygosity $<0.2$ , relatedness filter, EIGENSTRAT outliers removed                                                                      | 543945       | 1633     |
| The GSK/IOP/CAMH bipolar cohort                       | GSK-BIPOLAR  | Bipolar depression case-control      | Illumina HumanHap 550 | BeadStudio                 | Call Rate $\leq 95\%$ , MAF $<0.15\%$                                                                                                     | male X-chromosome homozygosity $>0.8$ , female X-chromosome homozygosity $<0.2$ , relatedness filter, EIGENSTRAT outliers removed                                                                      | 510886       | 1805     |
| The GSK/MPI depression cohort                         | GSK-UNIPOLAR | Unipolar depression case-control     | Illumina HumanHap 550 | BeadStudio                 | Call Rate $\leq 95\%$ , MAF $<0.15\%$                                                                                                     | male X-chromosome homozygosity $>0.8$ , female X-chromosome homozygosity $<0.2$ , relatedness filter, EIGENSTRAT outliers removed                                                                      | 511590       | 1792     |
| The UK IBD Genetics Consortium                        | WTCCC-IBD    | Crohn's disease cases                | Affymetrix 500K       | CHIAMO                     | HWE pval $\leq 5.7e-7$ , Call Rate $\leq 95\%$ , MAF $< 5\%$                                                                              | Call rate: $<97\%$ , Heterozygosity $>.3$ and $<.23$ , Samples with non-European ancestry, duplicated or closely related removed.                                                                      | 488756       | 1748     |
| The KORA Study                                        | KORA         | Population-based                     | Affymetrix 500K       | BRLMM                      |                                                                                                                                           | Call rate: $<93\%$                                                                                                                                                                                     | 471430       | 1644     |
| The KORCULA Study                                     | KORCULA      | Population-based                     | Illumina HumanHap 300 | BeadStudio                 | HWE pval $\leq 1e-10$ , Call Rate $\leq 98\%$ , MAF $\leq 2\%$                                                                            | Call rate: $<98\%$                                                                                                                                                                                     | 307728       | 827      |
| The LOLIPOP Study                                     | LOLIPOP      | Population-based                     | Affymetrix 500K       | BRLMM                      | HWE pval $\leq 1e-4$ , Call Rate $\leq 95\%$ , MAF = $0\%$                                                                                | Call rate: $<95\%$ , Sex inconsistencies removed                                                                                                                                                       | 459497       | 1288     |
| The Medstar Cohort                                    | MEDSTAR      | Coronary Artery Disease case-control | Affymetrix 6.0        | BRLMM                      | HWE pval $\leq 1e-6$ , Call Rate $\leq 95\%$ , MAF $\leq 2\%$ , Differential missingness $p < 1e-3$ , Plate based association $p < 1e-10$ | Call rate: $<95\%$ , Heterozygosity filter, relatedness filters, non-European samples removed                                                                                                          | 869222       | 1322     |
| The Orkney Complex Disease Study                      | ORCADES      | Population-based                     | Illumina HumanHap 300 | BeadStudio                 | HWE pval $\leq 1e-10$ , Call Rate $\leq 98\%$ , MAF $\leq 2\%$                                                                            | Call rate: $<98\%$                                                                                                                                                                                     | 306207       | 692      |
| The PennCATH cohort                                   | PENNCATH     | Coronary Artery Disease case-control | Affymetrix 6.0        | BRLMM                      | HWE pval $\leq 1e-6$ , Call Rate $\leq 95\%$ , MAF $\leq 2\%$ , Differential missingness $p < 1e-3$ , Plate based association $p < 1e-10$ | Call rate: $<95\%$ , Heterozygosity filter, relatedness filters, non-European samples removed                                                                                                          | 906110       | 1401     |
| The Popgen Biobank Study                              | POPGEN       | Population-based                     | Affymetrix 6.0        | BRLMM                      | HWE pval $\leq 1e-4$ , Call Rate $\leq 95\%$                                                                                              | Call rate: $<95\%$ , non-European samples removed                                                                                                                                                      | 849506       | 1107     |
| Cohorte Lausannoise                                   | CoLaus       | Population-based                     | Affymetrix 500K       | BRLMM                      | HWE pval $\leq 1e-4$ , Call Rate $\leq 95\%$ , MAF = $0\%$                                                                                | Call rate: $<95\%$ , Sex inconsistencies removed                                                                                                                                                       | 460404       | 5636     |
| The Sardinia study                                    | SardiNIA     | Population-based                     | Affymetrix 500K + 10K | BRLMM                      | HWE pval $\leq 1e-6$ , Call Rate $\leq 95\%$ , MAF $\leq 5\%$                                                                             | Call rate: $<95\%$                                                                                                                                                                                     | 356,359      | 4,305    |
| The Study of Health in Pomerania                      | SHIP         | Population-based                     | Affymetrix 6.0        | Birdseed 2                 |                                                                                                                                           | Call rate: $<92\%$                                                                                                                                                                                     | 893579       | 4080     |
| The VIS Study                                         | VIS          | Population-based                     | Illumina HumanHap 300 | BeadStudio                 | HWE pval $\leq 1e-10$ , Call Rate $\leq 98\%$ , MAF $\leq 2\%$                                                                            | Call rate: $<98\%$                                                                                                                                                                                     | 305068       | 769      |
| The WTCCC-CAD cohort                                  | WTCCC-CAD    | Coronary Artery Disease cases        | Affymetrix 500K       | CHIAMO                     | HWE pval $\leq 5.7e-7$ , Call Rate $\leq 95\%$ , MAF $< 5\%$                                                                              | Call rate: $<97\%$ , Heterozygosity $>.3$ and $<.23$ , Samples with non-European ancestry, duplicated or closely related removed.                                                                      | 488756       | 1926     |
| <b>TOTAL</b>                                          |              |                                      |                       |                            |                                                                                                                                           |                                                                                                                                                                                                        | <b>41150</b> |          |

| Imputation Software | Post-imputation #SNPs | Association Analysis Software | Covariates used in analysis            | Total sample size |        | CPD phenotype (maximal, average, n/a) | Sample Size for CPD > 0 | CPD Mean (SD) for CPD > 0 samples | Sample Size |       | Sample Size |       | Other Name   |         |             |
|---------------------|-----------------------|-------------------------------|----------------------------------------|-------------------|--------|---------------------------------------|-------------------------|-----------------------------------|-------------|-------|-------------|-------|--------------|---------|-------------|
|                     |                       |                               |                                        | Male              | Female |                                       |                         |                                   | All         | All   | Ever        | Never |              | Current | Non-current |
|                     |                       |                               |                                        |                   |        |                                       |                         |                                   |             |       |             |       |              |         |             |
| IMPUTE              | 2614446               | SNPTEST                       | Sex, Age                               | 470               | 1390   | n/a                                   | n/a                     | n/a                               | n/a         | n/a   | 262         | 558   | WTCCC-RA     |         |             |
| IMPUTE              | 2549220               | SNPTEST                       | Sex, Age, Case-control status          | 1608              | 1908   | n/a                                   | n/a                     | n/a                               | 1927        | 1589  | 353         | 1574  | EPIC         |         |             |
| IMPUTE              | 2614446               | SNPTEST                       | Sex, Age                               | 775               | 1177   | maximal                               | 830                     | 17.2(11.9)                        | n/a         | n/a   | 1274        | 672   | WTCCC-HT     |         |             |
| IMPUTE              | 2600508               | SNPTEST                       | Sex, Age, Case-control status, Country | 1094              | 753    | maximal                               | 862                     | 19.1(12.8)                        | 910         | 793   | 268         | 642   | GSK-GEMS     |         |             |
| IMPUTE              | 2565431               | SNPTEST                       | Sex, Age, Case-control status          | 901               | 732    | average                               | 1632                    | 14.6(7.8)                         | n/a         | n/a   | 725         | 905   | GSK-COPD     |         |             |
| IMPUTE              | 2547468               | SNPTEST                       | Sex, Age, Case-control status          | 697               | 1108   | maximal                               | 944                     | 15.5(11.7)                        | 1008        | 790   | 498         | 510   | GSK-BIPOLAR  |         |             |
| IMPUTE              | 2549858               | SNPTEST                       | Sex, Age, Case-control status          | 589               | 1203   | maximal                               | 899                     | 17.9(11.9)                        | 935         | 856   | 503         | 432   | GSK-UNIPOLAR |         |             |
| IMPUTE              | 2614446               | SNPTEST                       | Sex, Age                               | 680               | 1068   | n/a                                   | n/a                     | n/a                               | 713         | 540   | 713         | 420   | WTCCC-IBD    |         |             |
| IMPUTE              | 2597224               | SNPTEST                       | Sex, Age                               | 813               | 831    | maximal                               | 253                     | 16.7(9.4)                         | 811         | 831   | 217         | 1425  | KORA         |         |             |
| MACH                | 2543888               | ProbABEL                      | Sex, Age, 3 PCA-derived covariates     | 300               | 527    | n/a                                   | n/a                     | n/a                               | 376         | 451   | 179         | 654   | KORCULA      |         |             |
| IMPUTE              | 2711866               | SNPTEST                       | Sex, Age, Race                         | 969               | 319    | maximal                               | 650                     | 17.1(13.5)                        | 653         | 635   | 258         | 395   | GSK-LOLIPOP  |         |             |
| IMPUTE              | 2739753               | SNPTEST                       | Sex, Age, Case-control status          | 857               | 465    | maximal                               | 820                     | 25.1(16.6)                        | 853         | 469   | 300         | 553   | GSK-MEDSTAR  |         |             |
| MACH                | 2543888               | ProbABEL                      | Sex, Age, 3 PCA-derived covariates     | 322               | 370    | n/a                                   | n/a                     | n/a                               | 288         | 404   | 60          | 632   | ORCADES      |         |             |
| IMPUTE              | 2745959               | SNPTEST                       | Sex, Age, Case-control status          | 932               | 469    | n/a                                   | n/a                     | n/a                               | n/a         | n/a   | 464         | 612   | PENNCATH     |         |             |
|                     | 2726564               | SNPTEST                       |                                        | 620               | 487    | average                               | 573                     | 16.3(11.5)                        | 495         | 608   | n/a         | n/a   | POPGEN       |         |             |
| IMPUTE              | 2606530               | SNPTEST                       | Sex, Age                               | 2659              | 2977   | maximal                               | 3132                    | 18.2(12.8)                        | 3357        | 2275  | 1485        | 1872  | GSK-LAUSANNE |         |             |
| MACH                | 2252250               | MERLIN                        | Sex, Age, Age <sup>2</sup>             | 1886              | 2419   | average                               | 1731                    | 16.2(11.6)                        | 1743        | 2562  | 873         | 3432  | SardinIA     |         |             |
| IMPUTE              | 2823150               | SNPTEST                       | Sex, Age                               | 2009              | 2071   | average                               | 2011                    | 15.9(9.163)                       | 2631        | 1449  | 1240        | 2840  | SHIP         |         |             |
| MACH                | 2543888               | ProbABEL                      | Sex, Age, 3 PCA-derived covariates     | 323               | 446    | n/a                                   | n/a                     | n/a                               | 441         | 328   | 212         | 557   | VIS          |         |             |
| IMPUTE              | 2614446               | SNPTEST                       | Sex, Age                               | 1527              | 399    | average                               | 1237                    | 21.3(13.6)                        | 1457        | 461   | 239         | 1218  | WTCCC-CAJ    |         |             |
|                     |                       |                               |                                        | 20031             | 21119  |                                       | 15574                   |                                   | 18598       | 15041 | 10123       | 19903 | TOTAL        |         |             |

**Supplementary Table 2.** Summary information for the top 15 loci of interest arising from analysis of each of the three traits (SQ, EVER/NEVER, Current/Non-current). Our study is referred to as OX-GSK. (Table covers six pages).

| Trait | Region | SNP (rs ID) | Chr | Position  | Coded  |        | Non-coded Allele | MAF  | OX-GSK heterozygosity |         |          | TAG      | ENGAGE   | Combined       |         |
|-------|--------|-------------|-----|-----------|--------|--------|------------------|------|-----------------------|---------|----------|----------|----------|----------------|---------|
|       |        |             |     |           | Allele | Allele |                  |      | P-value               | P-value | P-value  | P-value  | P-value  | Beta (SE)      |         |
|       |        |             |     |           |        |        |                  |      |                       |         |          |          |          |                | P-value |
| SO    | 1      | rs1992810   | 2   | 29120881  | T      | C      | C                | 0.91 | 6.34E-06              | 0.43    | 6.83E-01 | 4.17E-01 | 5.13E-02 | -0.014(0.0070) |         |
| SO    |        | rs2276551   | 2   | 29121879  | T      | A      | A                | 0.15 | 1.58E-05              | 0.25    | 7.85E-01 | 4.94E-01 | 1.53E-01 | 0.006(0.0041)  |         |
| SO    |        | rs7600186   | 2   | 150272350 | G      | A      | A                | 0.84 | 1.51E-05              | 0.04    | 2.10E-01 | 9.63E-01 | 1.29E-02 | -0.020(0.0067) |         |
| SO    |        | rs16827371  | 2   | 150272421 | T      | A      | A                | 0.18 | 1.75E-05              | 0.13    | 9.51E-01 | 7.73E-01 | 8.58E-02 | 0.002(0.0025)  |         |
| SO    |        | rs17801127  | 2   | 150272730 | T      | C      | C                | 0.18 | 1.82E-05              | 0.13    | 9.71E-01 | 7.51E-01 | 1.01E-01 | 0.002(0.0022)  |         |
| SO    |        | rs16827376  | 2   | 150273093 | G      | A      | A                | 0.88 | 1.57E-05              | 0.13    | 9.71E-01 | 7.92E-01 | 1.01E-01 | -0.001(0.0014) |         |
| SO    |        | rs17744655  | 2   | 150274565 | T      | G      | G                | 0.88 | 1.50E-05              | 0.13    | 9.65E-01 | 6.90E-01 | 6.32E-02 | -0.006(0.0042) |         |
| SO    |        | rs10195910  | 2   | 150352201 | T      | C      | C                | 0.19 | 7.92E-05              | 0.10    | 7.40E-01 | 8.72E-01 | 1.11E-01 | 0.013(0.0077)  |         |
| SO    |        | rs13000594  | 2   | 150375293 | C      | A      | A                | 0.19 | 6.60E-05              | 0.09    | 8.02E-01 | 8.64E-01 | 9.97E-02 | 0.013(0.0077)  |         |
| SO    |        | rs12990176  | 2   | 150385322 | T      | G      | G                | 0.88 | 6.23E-05              | 0.08    | 7.81E-01 | 6.81E-01 | 9.86E-01 | 0.000(0.0005)  |         |
| SO    |        | rs3934719   | 3   | 185889310 | T      | C      | C                | 0.22 | 1.00E-06              | 0.09    | 2.76E-01 | 2.58E-01 | 2.19E-02 | -0.015(0.0065) |         |
| SO    |        | rs3934720   | 3   | 185889376 | C      | A      | A                | 0.22 | 4.34E-06              | 0.07    | 2.76E-01 | 1.43E-01 | 5.48E-02 | -0.012(0.0061) |         |
| SO    |        | rs3936001   | 3   | 185891226 | G      | A      | A                | 0.84 | 4.87E-06              | 0.06    | 2.33E-01 | 1.43E-01 | 4.71E-02 | 0.012(0.0062)  |         |
| SO    |        | rs7653781   | 3   | 185891395 | G      | A      | A                | 0.84 | 5.02E-06              | 0.05    | 2.40E-01 | 1.86E-01 | 3.32E-02 | 0.014(0.0064)  |         |
| SO    |        | rs4699369   | 4   | 100028445 | G      | A      | A                | 0.74 | 1.03E-04              | 0.06    | 2.22E-01 | 2.93E-01 | 7.29E-01 | -0.002(0.0057) |         |
| SO    |        | rs4699689   | 4   | 100028612 | T      | C      | C                | 0.29 | 1.12E-04              | 0.06    | 2.23E-01 | 2.73E-01 | 7.69E-01 | 0.002(0.0057)  |         |
| SO    |        | rs13110878  | 4   | 100038622 | C      | A      | A                | 0.29 | 1.04E-04              | 0.06    | 2.35E-01 | 4.11E-01 | 7.00E-01 | 0.002(0.0055)  |         |
| SO    |        | rs11735758  | 4   | 100039279 | T      | A      | A                | 0.74 | 8.46E-05              | 0.06    | 4.36E-01 | 3.18E-01 | 5.13E-01 | -0.004(0.0055) |         |
| SO    |        | rs11736580  | 4   | 100039383 | T      | C      | C                | 0.71 | 1.00E-04              | 0.06    | 3.65E-01 | 1.22E-01 | 8.06E-01 | -0.001(0.0050) |         |
| SO    |        | rs117570252 | 4   | 100041928 | T      | C      | C                | 0.71 | 1.03E-04              | 0.06    | 4.07E-01 | 1.27E-01 | 7.72E-01 | -0.002(0.0050) |         |
| SO    |        | rs117583053 | 4   | 100045380 | T      | C      | C                | 0.31 | 1.02E-04              | 0.08    | 3.81E-01 | 1.58E-01 | 7.37E-01 | 0.002(0.0050)  |         |
| SO    |        | rs11727086  | 4   | 100047391 | G      | A      | A                | 0.32 | 1.36E-04              | 0.06    | 3.96E-01 | 1.68E-01 | 7.17E-01 | 0.002(0.0051)  |         |
| SO    |        | rs13107892  | 4   | 100071418 | T      | C      | C                | 0.69 | 1.43E-05              | 0.05    | 2.73E-01 | 1.57E-01 | 7.04E-01 | -0.002(0.0050) |         |
| SO    |        | rs117511498 | 4   | 100074264 | G      | A      | A                | 0.31 | 8.63E-05              | 0.07    | 4.34E-01 | 1.33E-01 | 7.89E-01 | 0.001(0.0051)  |         |
| SO    |        | rs13124855  | 4   | 100076131 | G      | A      | A                | 0.71 | 8.10E-05              | 0.06    | 3.31E-01 | 1.07E-01 | 7.43E-01 | -0.002(0.0053) |         |
| SO    |        | rs7688221   | 4   | 100094880 | T      | G      | G                | 0.69 | 1.19E-05              | 0.05    | 2.49E-01 | 1.24E-01 | 7.40E-01 | -0.002(0.0050) |         |
| SO    |        | rs7688298   | 4   | 165343709 | T      | G      | G                | 0.13 | 8.05E-05              | 0.93    | 4.82E-01 | 8.62E-02 | 1.45E-03 | -0.029(0.0092) |         |
| SO    |        | rs7691336   | 4   | 165347194 | T      | A      | A                | 0.86 | 1.26E-05              | 0.73    | 2.37E-01 | 4.91E-01 | 1.53E-03 | 0.021(0.0069)  |         |
| SO    |        | rs10001526  | 4   | 165352417 | T      | G      | G                | 0.13 | 7.54E-05              | 0.92    | 4.59E-01 | 3.82E-02 | 9.56E-04 | -0.033(0.0100) |         |
| SO    |        | rs13141215  | 4   | 165389441 | T      | A      | A                | 0.13 | 6.20E-05              | 0.91    | 5.76E-01 | 7.63E-02 | 1.79E-03 | -0.028(0.0090) |         |
| SO    |        | rs17044785  | 4   | 165390408 | T      | A      | A                | 0.13 | 6.21E-05              | 0.91    | 5.68E-01 | 7.54E-02 | 1.72E-03 | -0.028(0.0090) |         |
| SO    |        | rs7682877   | 4   | 165390554 | T      | A      | A                | 0.13 | 6.21E-05              | 0.91    | 5.65E-01 | 8.03E-02 | 1.84E-03 | -0.029(0.0093) |         |
| SO    |        | rs17044794  | 4   | 165391095 | T      | C      | C                | 0.93 | 5.62E-05              | 0.91    | 5.66E-01 | 7.53E-02 | 1.64E-03 | 0.028(0.0090)  |         |
| SO    |        | rs17044801  | 4   | 165392213 | G      | A      | A                | 0.93 | 5.63E-05              | 0.91    | 5.65E-01 | 8.06E-02 | 1.78E-03 | 0.029(0.0093)  |         |
| SO    |        | rs12711364  | 4   | 165392765 | T      | C      | C                | 0.13 | 5.63E-05              | 0.91    | 5.62E-01 | 6.30E-02 | 1.71E-03 | -0.030(0.0097) |         |
| SO    |        | rs17044809  | 4   | 165393567 | G      | A      | A                | 0.93 | 5.63E-05              | 0.91    | 5.51E-01 | 1.40E-01 | 2.66E-03 | 0.026(0.0087)  |         |
| SO    |        | rs2321381   | 4   | 165395793 | G      | A      | A                | 0.93 | 6.22E-05              | 0.91    | 5.33E-01 | 1.77E-01 | 3.26E-03 | 0.025(0.0086)  |         |
| SO    |        | rs4362777   | 4   | 165396088 | G      | A      | A                | 0.93 | 5.64E-05              | 0.91    | 5.51E-01 | 1.22E-01 | 2.35E-03 | 0.026(0.0088)  |         |
| SO    |        | rs13109568  | 4   | 165397507 | G      | A      | A                | 0.13 | 5.63E-05              | 0.91    | 5.27E-01 | 1.40E-01 | 2.44E-03 | -0.026(0.0087) |         |
| SO    |        | rs7688153   | 4   | 165398055 | T      | C      | C                | 0.13 | 5.16E-05              | 0.92    | 5.24E-01 | 1.20E-01 | 2.00E-03 | -0.027(0.0088) |         |
| SO    |        | rs17044823  | 4   | 165399131 | T      | A      | A                | 0.93 | 5.81E-05              | 0.71    | 5.07E-01 | 1.40E-01 | 2.19E-03 | 0.026(0.0087)  |         |
| SO    |        | rs6853526   | 4   | 165399149 | G      | A      | A                | 0.93 | 4.75E-05              | 0.93    | 4.95E-01 | 1.19E-01 | 1.72E-03 | 0.027(0.0088)  |         |
| SO    |        | rs9380071   | 4   | 165401355 | T      | G      | G                | 0.13 | 6.18E-05              | 0.91    | 4.99E-01 | 1.57E-01 | 2.55E-03 | -0.026(0.0087) |         |
| SO    |        | rs17044842  | 4   | 165402196 | C      | A      | A                | 0.13 | 6.21E-05              | 0.91    | 5.00E-01 | 1.57E-01 | 2.56E-03 | -0.026(0.0087) |         |
| SO    |        | rs9284674   | 4   | 165403008 | T      | A      | A                | 0.93 | 6.23E-05              | 0.91    | 4.69E-01 | 8.46E-02 | 1.28E-03 | 0.029(0.0091)  |         |
| SO    |        | rs9380076   | 4   | 165403267 | C      | A      | A                | 0.14 | 1.13E-04              | 0.98    | 4.79E-01 | 9.93E-02 | 1.71E-03 | -0.027(0.0086) |         |
| SO    |        | rs9380077   | 4   | 165403384 | T      | C      | C                | 0.93 | 7.03E-05              | 0.89    | 4.75E-01 | 8.41E-02 | 1.33E-03 | 0.029(0.0091)  |         |
| SO    |        | rs13151481  | 4   | 184522011 | T      | C      | C                | 0.46 | 1.25E-06              | 0.11    | 6.02E-01 | 6.01E-01 | 7.91E-02 | 0.010(0.0055)  |         |
| SO    |        | rs6552663   | 4   | 184524289 | T      | C      | C                | 0.45 | 1.93E-05              | 0.30    | 6.98E-01 | 1.12E-01 | 4.16E-01 | -0.004(0.0051) |         |
| SO    |        | rs867658    | 4   | 184524338 | T      | C      | C                | 0.45 | 1.38E-05              | 0.31    | 6.85E-01 | 1.06E-01 | 4.19E-01 | -0.004(0.0050) |         |
| SO    |        | rs6854131   | 4   | 184530704 | T      | A      | A                | 0.47 | 3.83E-05              | 0.43    | 7.30E-01 | 1.49E-01 | 4.00E-01 | -0.004(0.0050) |         |
| SO    |        | rs1983245   | 4   | 184535664 | T      | A      | A                | 0.45 | 1.79E-05              | 0.05    | 4.34E-01 | 3.66E-01 | 3.37E-01 | 0.007(0.0050)  |         |
| SO    |        | rs7686728   | 4   | 184541581 | T      | G      | G                | 0.87 | 9.46E-05              | 0.52    | 6.74E-03 | 7.11E-01 | 7.39E-01 | -0.002(0.0067) |         |
| SO    |        | rs400405    | 6   | 4495717   | T      | C      | C                | 0.86 | 1.36E-04              | 0.80    | 5.36E-01 | 5.12E-01 | 1.15E-02 | -0.021(0.0076) |         |
| SO    |        | rs420580    | 6   | 4498560   | T      | C      | C                | 0.20 | 7.34E-05              | 0.71    | 4.67E-01 | 3.54E-01 | 3.88E-03 | 0.020(0.0069)  |         |
| SO    |        | rs378901    | 6   | 4503581   | G      | A      | A                | 0.84 | 5.80E-05              | 0.71    | 4.24E-01 | 2.43E-01 | 2.16E-03 | -0.022(0.0071) |         |
| SO    |        | rs84996     | 6   | 4504209   | T      | C      | C                | 0.84 | 1.97E-05              | 0.75    | 4.21E-01 | 4.26E-01 | 2.96E-03 | -0.020(0.0066) |         |
| SO    |        | rs424137    | 6   | 4514762   | T      | G      | G                | 0.85 | 5.18E-05              | 0.71    | 4.62E-01 | 5.34E-01 | 9.70E-03 | -0.017(0.0063) |         |
| SO    |        | rs601192    | 6   | 4515738   | C      | A      | A                | 0.19 | 4.91E-05              | 0.72    | 4.60E-01 | 5.70E-01 | 1.21E-02 | 0.016(0.0062)  |         |
| SO    |        | rs385236    | 6   | 4516490   | T      | A      | A                | 0.85 | 5.19E-05              | 0.71    | 4.58E-01 | 5.72E-01 | 1.29E-02 | -0.016(0.0062) |         |
| SO    |        | rs385884    | 6   | 4516658   | T      | C      | C                | 0.85 | 5.19E-05              | 0.71    | 4.61E-01 | 6.20E-01 | 2.33E-02 | -0.014(0.0058) |         |
| SO    |        | rs377207    | 6   | 4517013   | T      | C      | C                | 0.19 | 4.90E-05              | 0.72    | 4.62E-01 | 5.93E-01 | 1.56E-02 | 0.015(0.0061)  |         |
| SO    |        | rs418563    | 6   | 4519538   | G      | C      | C                | 0.19 | 4.90E-05              | 0.72    | 4.65E-01 | 5.93E-01 | 1.58E-02 | 0.015(0.0060)  |         |
| SO    |        | rs6913171   | 6   | 4522403   | G      | A      | A                | 0.85 | 4.87E-05              | 0.69    | 4.68E-01 | 5.73E-01 | 1.36E-02 | -0.016(0.0061) |         |
| SO    |        | rs9504151   | 6   | 4522908   | T      | A      | A                | 0.85 | 4.78E-05              | 0.70    | 4.78E-01 | 4.97E-01 | 7.54E-03 | -0.018(0.0065) |         |
| SO    |        | rs9502199   | 6   | 4523438   | T      | C      | C                | 0.85 | 4.94E-05              | 0.70    | 4.79E-01 | 4.97E-01 | 7.66E-03 | -0.018(0.0065) |         |
| SO    |        | rs4960004   | 6   | 4524697   | T      | C      | C                | 0.18 | 1.18E-04              | 0.59    | 6.31E-01 | 4.66E-01 | 1.21E-02 | 0.019(0.0075)  |         |
| SO    |        | rs9502200   | 6   | 4525147   | T      | C      | C                | 0.19 | 4.64E-05              | 0.71    | 5.09E-01 | 5.08E-01 | 8.47E-03 | 0.018(0.0065)  |         |
| SO    |        | rs9504152   | 6   | 4526321   | T      | C      | C                | 0.85 | 3.97E-05              | 0.74    | 5.18E-01 | 6.14E-01 | 2.08E-02 | -0.015(0.0059) |         |
| SO    |        | rs9504154   | 6   | 4530548   | G      | A      | A                | 0.85 | 8.83E-05              | 0.85    | 4.93E-01 | 5.13E-01 | 9.24E-03 | -0.017(0.0065) |         |
| SO    |        | rs9504156   | 6   | 4533125   | G      | A      | A                | 0.85 | 5.32E-05              | 0.84    | 5.78E-01 | 5.14E-01 | 1.15E-02 | -0.017(0.0065) |         |
| SO    |        | rs9504159   | 6   | 4538084   | T      | C      | C                | 0.86 | 1.16E-04              | 0.92    | 8.64E-01 | 9.29E-01 | 3.38E-02 | -0.017(0.0077) |         |
| SO    |        | rs6911463   | 6   | 4547820   | T      | G      | G                | 0.85 | 9.51E-05              | 0.88    | 6.70E-01 | 7.29E-01 | 1.97E-02 | -0.017(0.0070) |         |
| SO    |        | rs11964426  | 6   | 4551153   | G      | A      | A                | 0.86 | 1.15E-04              | 0.91    | 5.96E-01 | 8.25E-01 | 1.70E-01 | -0.011(0.0057) |         |
| SO    |        | rs11756102  | 6   | 4559057   | T      | G      | G                | 0.19 | 2.69E-05              | 0.63    | 9.82E-01 | 9.98E-01 | 1.63E-02 | 0.017(0.0077)  |         |
| SO    |        | rs3734887   | 6   | 168136625 | T      | C      | C                | 0.26 | 1.15E-05              | 0.15    | 8.59E-01 | 1.23E-01 | 7.69E-03 | 0.014(0.0052)  |         |
| SO    |        | rs2285250   | 6   | 168147545 | T      | C      | C                | 0.87 | 1.24E-04              | 0.36    | 9.55E-01 | 4.92E-01 | 3.80E-02 | -0.015(0.0072) |         |
| SO    |        | rs1873333   | 6   | 168151682 | T      | C      | C                | 0.25 | 7.00E-05              | 0.46    | 7.87E-01 | 3.09E-01 | 2.32E-02 | 0.012(0.0053)  |         |
| SO    |        | rs899366    | 8   | 11467894  | G      | A      | A                | 0.68 | 1.50E-06              | 0.76    | 7.18E-01 | 7.98E-01 | 4.02E-01 | -0.002(0.0023) |         |
| SO    |        | rs12679960  | 8   | 11468399  | T      | C      | C                | 0.33 | 1.64E-05              | 0.71    | 7.93E-01 | 8.80E-01 | 3.47E-01 | 0.009(0.0050)  |         |
| SO    |        | rs4841566</ |     |           |        |        |                  |      |                       |         |          |          |          |                |         |



|    |  |            |    |          |   |   |      |          |      |          |          |          |                |
|----|--|------------|----|----------|---|---|------|----------|------|----------|----------|----------|----------------|
| SQ |  | rs12677326 | 8  | 11476634 | G | A | 0.70 | 1.42E-05 | 0.49 | 7.10E-01 | 4.38E-01 | 1.94E-02 | -0.009(0.0038) |
| SQ |  | rs11250149 | 8  | 11477370 | G | C | 0.32 | 1.79E-05 | 0.51 | 7.52E-01 | 7.28E-01 | 6.11E-02 | 0.004(0.0029)  |
| SQ |  | rs4840572  | 8  | 11480613 | G | A | 0.70 | 1.37E-05 | 0.48 | 7.37E-01 | 6.78E-01 | 5.33E-02 | -0.005(0.0030) |
| SQ |  | rs1478894  | 8  | 11486163 | T | C | 0.36 | 9.13E-05 | 0.49 | 3.49E-01 | 4.55E-01 | 1.86E-01 | 0.005(0.0042)  |
| SQ |  | rs17376459 | 8  | 27319091 | G | A | 0.22 | 1.54E-05 | 0.03 | 4.93E-02 | 2.55E-01 | 1.20E-04 | 0.023(0.0059)  |
| SQ |  | rs11782673 | 8  | 27321804 | G | A | 0.21 | 5.26E-07 | 0.10 | 5.89E-02 | 2.16E-01 | 3.38E-05 | -0.001(0.0059) |
| SQ |  | rs11782789 | 8  | 27322204 | T | A | 0.21 | 7.12E-06 | 0.02 | 5.87E-02 | 2.23E-01 | 9.15E-05 | 0.024(0.0059)  |
| SQ |  | rs4733058  | 8  | 27337813 | T | C | 0.84 | 1.04E-05 | 0.02 | 5.77E-02 | 2.76E-01 | 1.51E-04 | -0.023(0.0059) |
| SQ |  | rs577803   | 8  | 27569602 | T | G | 0.58 | 4.82E-06 | 0.64 | 6.35E-01 | 2.31E-02 | 2.86E-04 | 0.017(0.0047)  |
| SQ |  | rs2640732  | 8  | 27573740 | T | G | 0.57 | 2.47E-05 | 0.76 | 7.49E-01 | 1.17E-02 | 8.27E-05 | 0.022(0.0054)  |
| SQ |  | rs505295   | 8  | 27578495 | C | A | 0.58 | 7.89E-06 | 0.88 | 5.64E-01 | 6.33E-03 | 8.66E-05 | 0.019(0.0047)  |
| SQ |  | rs1032087  | 8  | 77907350 | G | A | 0.35 | 5.06E-05 | 0.34 | 6.89E-02 | 4.57E-02 | 7.71E-02 | -0.009(0.0048) |
| SQ |  | rs12549946 | 8  | 77986587 | G | A | 0.40 | 9.27E-05 | 0.04 | 7.72E-02 | 3.36E-01 | 4.00E-02 | -0.009(0.0043) |
| SQ |  | rs12550004 | 8  | 77986939 | C | A | 0.40 | 7.27E-05 | 0.04 | 7.92E-02 | 2.39E-01 | 4.42E-02 | -0.009(0.0044) |
| SQ |  | rs10090601 | 8  | 78159960 | T | C | 0.64 | 1.21E-04 | 0.70 | 9.69E-02 | 3.30E-01 | 5.20E-02 | -0.009(0.0043) |
| SQ |  | rs16939415 | 8  | 78160624 | T | C | 0.65 | 1.07E-04 | 0.68 | 9.30E-02 | 3.37E-01 | 4.27E-02 | -0.009(0.0044) |
| SQ |  | rs10504644 | 8  | 78174926 | G | A | 0.40 | 5.87E-05 | 0.63 | 1.01E-01 | 2.56E-01 | 5.17E-02 | 0.009(0.0045)  |
| SQ |  | rs4344050  | 8  | 78177587 | T | C | 0.64 | 2.64E-05 | 0.63 | 1.20E-01 | 2.39E-01 | 4.48E-02 | -0.010(0.0047) |
| SQ |  | rs4338075  | 8  | 78177760 | G | C | 0.39 | 4.31E-05 | 0.56 | 1.30E-01 | 2.33E-01 | 3.95E-02 | 0.010(0.0048)  |
| SQ |  | rs11988590 | 8  | 78730078 | T | C | 0.97 | 9.56E-05 | 0.29 | 1.39E-02 | 1.50E-01 | 3.81E-01 | 0.012(0.0139)  |
| SQ |  | rs7916988  | 10 | 10649525 | T | C | 0.89 | 3.80E-06 | 0.82 | 1.27E-01 | 8.43E-01 | 1.89E-03 | 0.027(0.0081)  |
| SQ |  | rs7896493  | 10 | 10649584 | G | A | 0.89 | 3.88E-06 | 0.81 | 1.27E-01 | 9.10E-01 | 7.08E-03 | 0.017(0.0064)  |
| SQ |  | rs10841588 | 12 | 20709466 | G | A | 0.62 | 5.90E-05 | 0.43 | 3.63E-01 | 9.88E-01 | 1.52E-01 | -0.008(0.0054) |
| SQ |  | rs7138018  | 12 | 20726446 | G | C | 0.35 | 8.21E-05 | 0.65 | 9.79E-01 | 8.21E-01 | 5.10E-02 | 0.011(0.0053)  |
| SQ |  | rs7978643  | 12 | 20731490 | T | C | 0.69 | 8.18E-05 | 0.66 | 9.93E-01 | 8.74E-01 | 6.30E-02 | -0.010(0.0051) |
| SQ |  | rs11045388 | 12 | 20731988 | C | A | 0.69 | 7.96E-05 | 0.66 | 9.88E-01 | 8.23E-01 | 5.00E-02 | -0.011(0.0052) |
| SQ |  | rs6487133  | 12 | 20736419 | G | A | 0.69 | 8.13E-05 | 0.72 | 9.54E-01 | 8.40E-01 | 5.42E-02 | -0.010(0.0053) |
| SQ |  | rs959346   | 12 | 20743353 | G | A | 0.41 | 2.46E-06 | 0.71 | 5.41E-01 | 9.65E-01 | 1.34E-01 | 0.008(0.0051)  |
| SQ |  | rs10770705 | 12 | 20748734 | C | A | 0.69 | 3.71E-05 | 0.82 | 9.77E-01 | 9.48E-01 | 5.10E-02 | -0.011(0.0055) |
| SQ |  | rs2869032  | 15 | 76501616 | T | C | 0.79 | 4.42E-06 | 0.45 | 2.22E-18 | 1.81E-08 | 1.29E-29 | 0.060(0.0053)  |
| SQ |  | rs2869045  | 15 | 76505954 | T | C | 0.25 | 3.82E-06 | 0.47 | 2.47E-18 | 2.41E-09 | 1.10E-30 | -0.062(0.0054) |
| SQ |  | rs2568498  | 15 | 76508987 | T | A | 0.45 | 8.62E-05 | 0.91 | 1.81E-01 | 2.12E-03 | 1.06E-05 | -0.020(0.0045) |
| SQ |  | rs1394371  | 15 | 76511524 | T | C | 0.33 | 2.56E-14 | 0.37 | 1.19E-12 | 1.89E-11 | 2.19E-33 | 0.058(0.0048)  |
| SQ |  | rs2568500  | 15 | 76513983 | T | C | 0.44 | 7.98E-05 | 0.87 | 2.64E-02 | 3.50E-03 | 2.90E-07 | -0.027(0.0053) |
| SQ |  | rs17483548 | 15 | 76517368 | G | A | 0.66 | 4.23E-15 | 0.37 | 8.49E-19 | 1.27E-18 | 4.93E-48 | -0.036(0.0046) |
| SQ |  | rs17405217 | 15 | 76518204 | T | C | 0.36 | 4.19E-15 | 0.37 | 7.34E-19 | 6.02E-19 | 2.09E-48 | 0.068(0.0046)  |
| SQ |  | rs924840   | 15 | 76518863 | T | A | 0.26 | 1.91E-05 | 0.68 | 3.22E-17 | 8.49E-10 | 4.62E-29 | -0.059(0.0052) |
| SQ |  | rs2938671  | 15 | 76519809 | G | A | 0.79 | 1.12E-05 | 0.71 | 3.33E-17 | 5.89E-10 | 1.84E-29 | 0.059(0.0052)  |
| SQ |  | rs17483721 | 15 | 76520786 | T | C | 0.65 | 1.65E-15 | 0.36 | 4.95E-19 | 6.30E-19 | 7.01E-49 | -0.068(0.0046) |
| SQ |  | rs1847529  | 15 | 76522125 | C | A | 0.45 | 5.74E-05 | 0.78 | 1.18E-01 | 1.70E-03 | 3.72E-06 | -0.021(0.0044) |
| SQ |  | rs8041628  | 15 | 76522410 | G | C | 0.45 | 4.39E-05 | 0.77 | 1.14E-01 | 1.97E-03 | 3.47E-06 | -0.021(0.0045) |
| SQ |  | rs2568488  | 15 | 76523648 | T | A | 0.26 | 1.24E-05 | 0.74 | 2.32E-17 | 9.19E-09 | 1.15E-28 | -0.058(0.0052) |
| SQ |  | rs2656052  | 15 | 76527987 | G | A | 0.37 | 3.05E-15 | 0.22 | 2.30E-19 | 6.53E-19 | 5.57E-49 | 0.036(0.0046)  |
| SQ |  | rs2568494  | 15 | 76528019 | G | A | 0.65 | 1.14E-15 | 0.34 | 2.00E-19 | 4.52E-19 | 1.61E-49 | -0.068(0.0046) |
| SQ |  | rs7181486  | 15 | 76528673 | T | C | 0.65 | 1.31E-15 | 0.37 | 1.69E-19 | 4.26E-19 | 1.48E-49 | -0.068(0.0046) |
| SQ |  | rs2656073  | 15 | 76529331 | T | G | 0.26 | 1.64E-05 | 0.72 | 2.54E-17 | 1.78E-09 | 2.74E-29 | -0.059(0.0052) |
| SQ |  | rs17483929 | 15 | 76529431 | G | A | 0.65 | 8.48E-15 | 0.39 | 1.43E-19 | 6.32E-19 | 2.73E-49 | -0.068(0.0046) |
| SQ |  | rs10519198 | 15 | 76529809 | C | A | 0.56 | 3.25E-05 | 0.80 | 9.05E-02 | 1.69E-03 | 1.87E-06 | 0.021(0.0044)  |
| SQ |  | rs12909921 | 15 | 76530315 | G | A | 0.45 | 5.65E-05 | 0.78 | 8.18E-02 | 1.81E-03 | 2.16E-06 | -0.021(0.0044) |
| SQ |  | rs12910090 | 15 | 76530355 | C | A | 0.45 | 5.65E-05 | 0.78 | 7.95E-02 | 1.88E-03 | 2.13E-06 | -0.021(0.0045) |
| SQ |  | rs2656071  | 15 | 76532398 | T | A | 0.26 | 1.67E-05 | 0.76 | 2.55E-17 | 8.02E-10 | 1.25E-29 | -0.059(0.0052) |
| SQ |  | rs2656069  | 15 | 76532762 | T | C | 0.78 | 1.28E-05 | 0.74 | 1.58E-16 | 6.44E-10 | 4.19E-29 | 0.058(0.0052)  |
| SQ |  | rs2656065  | 15 | 76537604 | G | A | 0.65 | 1.15E-15 | 0.34 | 2.79E-20 | 3.75E-19 | 1.04E-50 | -0.069(0.0046) |
| SQ |  | rs2568483  | 15 | 76539398 | G | A | 0.26 | 1.29E-05 | 0.75 | 1.82E-17 | 1.47E-09 | 1.32E-29 | -0.059(0.0052) |
| SQ |  | rs11639224 | 15 | 76540426 | G | A | 0.45 | 5.53E-05 | 0.78 | 6.50E-02 | 1.54E-03 | 1.25E-06 | -0.022(0.0044) |
| SQ |  | rs1964678  | 15 | 76541055 | G | A | 0.61 | 1.04E-08 | 0.35 | 8.57E-15 | 3.57E-09 | 3.17E-29 | 0.028(0.0044)  |
| SQ |  | rs2009746  | 15 | 76541157 | G | A | 0.37 | 7.38E-16 | 0.33 | 9.60E-21 | 3.76E-19 | 1.67E-51 | 0.070(0.0046)  |
| SQ |  | rs2938674  | 15 | 76544968 | C | A | 0.78 | 2.21E-05 | 0.74 | 1.59E-17 | 1.25E-09 | 1.76E-29 | 0.058(0.0052)  |
| SQ |  | rs17484235 | 15 | 76548469 | G | C | 0.37 | 1.99E-15 | 0.21 | 7.28E-21 | 6.57E-19 | 4.38E-51 | 0.038(0.0046)  |
| SQ |  | rs4299116  | 15 | 76553249 | T | A | 0.40 | 1.00E-08 | 0.36 | 8.81E-15 | 2.11E-09 | 1.80E-29 | -0.050(0.0045) |
| SQ |  | rs1504550  | 15 | 76553305 | G | A | 0.37 | 6.97E-16 | 0.33 | 3.64E-21 | 2.55E-19 | 3.28E-52 | 0.070(0.0046)  |
| SQ |  | rs12910910 | 15 | 76554905 | T | C | 0.61 | 1.00E-08 | 0.36 | 9.10E-15 | 2.96E-09 | 3.03E-29 | 0.050(0.0044)  |
| SQ |  | rs8043227  | 15 | 76555926 | G | C | 0.62 | 1.18E-08 | 0.35 | 9.83E-15 | 2.87E-09 | 3.89E-29 | 0.050(0.0044)  |
| SQ |  | rs11072766 | 15 | 76558601 | T | C | 0.26 | 2.21E-05 | 0.74 | 1.18E-17 | 4.15E-10 | 4.90E-30 | -0.059(0.0052) |
| SQ |  | rs17484524 | 15 | 76559731 | G | A | 0.37 | 6.90E-16 | 0.33 | 1.67E-21 | 2.61E-19 | 1.44E-52 | 0.071(0.0046)  |
| SQ |  | rs8042238  | 15 | 76561326 | T | C | 0.61 | 1.00E-08 | 0.36 | 8.76E-15 | 1.64E-09 | 1.61E-29 | 0.050(0.0044)  |
| SQ |  | rs8042260  | 15 | 76561429 | G | A | 0.61 | 1.00E-08 | 0.36 | 8.74E-15 | 2.35E-09 | 2.64E-29 | 0.050(0.0044)  |
| SQ |  | rs12903295 | 15 | 76566027 | G | A | 0.61 | 9.99E-09 | 0.36 | 9.30E-15 | 4.17E-09 | 4.44E-29 | 0.051(0.0045)  |
| SQ |  | rs12904234 | 15 | 76566439 | T | C | 0.61 | 9.99E-09 | 0.36 | 1.42E-14 | 3.54E-09 | 6.24E-29 | 0.050(0.0045)  |
| SQ |  | rs965604   | 15 | 76576278 | G | A | 0.40 | 9.91E-09 | 0.36 | 1.00E-14 | 2.61E-09 | 1.59E-29 | -0.050(0.0044) |
| SQ |  | rs13180    | 15 | 76576543 | T | C | 0.61 | 5.82E-09 | 0.27 | 2.07E-14 | 2.83E-09 | 2.49E-29 | 0.050(0.0044)  |
| SQ |  | rs1062980  | 15 | 76579582 | T | C | 0.61 | 1.02E-08 | 0.36 | 7.84E-15 | 1.57E-09 | 1.32E-29 | 0.028(0.0044)  |
| SQ |  | rs4362358  | 15 | 76583159 | T | C | 0.61 | 9.92E-09 | 0.36 | 8.48E-16 | 2.57E-09 | 1.38E-30 | 0.051(0.0045)  |
| SQ |  | rs5019044  | 15 | 76583337 | T | A | 0.78 | 2.26E-05 | 0.74 | 2.56E-19 | 1.03E-08 | 5.62E-30 | -0.059(0.0052) |
| SQ |  | rs9788682  | 15 | 76589641 | G | A | 0.79 | 6.75E-08 | 0.55 | 5.34E-22 | 9.61E-13 | 2.40E-39 | 0.070(0.0054)  |
| SQ |  | rs9788721  | 15 | 76589924 | T | C | 0.64 | 1.79E-18 | 0.55 | 6.64E-26 | 4.12E-24 | 2.97E-64 | -0.077(0.0046) |
| SQ |  | rs7164594  | 15 | 76590112 | T | C | 0.26 | 2.68E-08 | 0.29 | 1.25E-22 | 2.01E-10 | 1.39E-37 | -0.067(0.0053) |
| SQ |  | rs8034191  | 15 | 76593078 | T | C | 0.64 | 4.99E-18 | 0.54 | 3.33E-26 | 3.82E-24 | 1.04E-63 | -0.077(0.0046) |
| SQ |  | rs12591557 | 15 | 76598787 | G | A | 0.42 | 8.47E-05 | 0.48 | 2.36E-02 | 1.18E-03 | 8.31E-08 | -0.029(0.0053) |
| SQ |  | rs10519203 | 15 | 76601101 | G | A | 0.38 | 2.96E-17 | 0.55 | 4.30E-26 | 2.66E-24 | 3.12E-63 | 0.077(0.0046)  |
| SQ |  | rs7163730  | 15 | 76601736 | G | A | 0.26 | 4.12E-08 | 0.43 | 7.45E-23 | 1.03E-12 | 4.39E-40 | -0.070(0.0053) |
| SQ |  | rs8031948  | 15 | 76603112 | T | G | 0.38 | 3.33E-18 | 0.56 | 1.97E-26 | 2.59E-24 | 1.62E-64 | 0.077(0.0046)  |
| SQ |  | rs4461039  | 15 | 76604502 | G | A | 0.26 | 2.08E-08 | 0.36 | 8.27E-23 | 2.49E-13 | 5.81E-41 | -0.070(0.0052) |
| SQ |  | rs931794   | 15 | 76613235 | G | A | 0.38 | 2.67E-18 | 0.57 | 6.80E-27 | 9.45E-25 | 7.75E-66 | 0.078(0.0046)  |
| SQ |  | rs2036534  | 15 | 76614003 | T | C | 0.78 | 2.05E-08 | 0.29 | 5.46E-22 | 3.25E-13 | 3.99E-40 | 0.069(0.0052)  |
| SQ |  | rs3813     |    |          |   |   |      |          |      |          |          |          |                |

|            |    |            |    |          |   |   |      |          |      |          |          |          |                |
|------------|----|------------|----|----------|---|---|------|----------|------|----------|----------|----------|----------------|
| SQ         |    | rs7173512  | 15 | 76636969 | T | C | 0.61 | 5.23E-05 | 0.85 | 2.52E-04 | 3.36E-04 | 1.90E-10 | 0.030(0.0046)  |
| SQ         |    | rs2036527  | 15 | 76638670 | G | A | 0.65 | 1.39E-18 | 0.60 | 6.36E-27 | 2.33E-23 | 6.62E-65 | -0.080(0.0047) |
| SQ         |    | rs684513   | 15 | 76645455 | G | C | 0.27 | 1.45E-08 | 0.10 | 1.39E-23 | 2.21E-10 | 5.75E-39 | -0.071(0.0054) |
| SQ         |    | rs667282   | 15 | 76650527 | T | C | 0.77 | 1.50E-09 | 0.06 | 2.72E-23 | 2.60E-12 | 1.07E-41 | 0.044(0.0053)  |
| SQ         |    | rs17486278 | 15 | 76654537 | C | A | 0.36 | 2.79E-18 | 0.86 | 1.67E-27 | 7.55E-23 | 3.71E-64 | 0.080(0.0047)  |
| SQ         |    | rs569207   | 15 | 76660174 | T | C | 0.23 | 1.25E-08 | 0.03 | 2.96E-06 | 4.67E-13 | 1.52E-24 | -0.063(0.0061) |
| SQ         |    | rs637137   | 15 | 76661031 | T | A | 0.77 | 1.30E-09 | 0.06 | 4.89E-23 | 1.14E-12 | 1.07E-41 | 0.071(0.0053)  |
| SQ         |    | rs7180002  | 15 | 76661048 | T | A | 0.36 | 2.31E-18 | 0.88 | 1.59E-27 | 1.31E-22 | 5.83E-64 | 0.080(0.0047)  |
| SQ         |    | rs951266   | 15 | 76665596 | G | A | 0.64 | 1.09E-14 | 0.89 | 1.35E-27 | 3.52E-23 | 3.19E-61 | -0.079(0.0048) |
| SQ         | 14 | rs16969968 | 15 | 76669980 | G | A | 0.65 | 1.64E-18 | 0.86 | 1.85E-27 | 1.53E-23 | 4.29E-65 | -0.078(0.0046) |
| SQ         |    | rs518425   | 15 | 76670868 | G | A | 0.32 | 3.66E-08 | 0.59 | 3.42E-18 | 6.52E-13 | 2.73E-36 | -0.061(0.0049) |
| SQ         |    | rs578776   | 15 | 76675455 | G | A | 0.73 | 6.69E-09 | 0.51 | 9.75E-19 | 1.38E-12 | 6.93E-37 | 0.062(0.0049)  |
| SQ         |    | rs12910984 | 15 | 76678682 | G | A | 0.27 | 6.37E-10 | 0.09 | 5.07E-23 | 6.21E-13 | 2.96E-42 | -0.071(0.0052) |
| SQ         |    | rs1051730  | 15 | 76681394 | G | A | 0.66 | 9.45E-19 | 0.68 | 3.62E-27 | 9.98E-25 | 1.71E-66 | -0.079(0.0046) |
| SQ         |    | rs3743078  | 15 | 76681814 | G | C | 0.78 | 4.83E-10 | 0.10 | 5.21E-24 | 1.20E-13 | 4.62E-44 | 0.073(0.0052)  |
| SQ         |    | rs1317286  | 15 | 76683184 | G | A | 0.37 | 1.31E-18 | 0.87 | 2.61E-27 | 8.98E-24 | 3.56E-65 | 0.078(0.0046)  |
| SQ         |    | rs938682   | 15 | 76683602 | G | A | 0.27 | 6.75E-10 | 0.12 | 5.48E-23 | 6.73E-14 | 3.29E-43 | -0.072(0.0052) |
| SQ         |    | rs12914385 | 15 | 76685778 | T | C | 0.41 | 4.48E-18 | 0.54 | 5.49E-29 | 1.23E-22 | 7.83E-66 | 0.076(0.0044)  |
| SQ         |    | rs11637630 | 15 | 76686774 | G | A | 0.27 | 5.19E-10 | 0.09 | 5.80E-24 | 9.06E-14 | 3.76E-44 | -0.073(0.0052) |
| SQ         |    | rs7177514  | 15 | 76694461 | G | C | 0.27 | 5.55E-10 | 0.09 | 6.46E-24 | 5.06E-12 | 2.92E-42 | -0.072(0.0053) |
| SQ         |    | rs6495308  | 15 | 76694711 | T | C | 0.77 | 3.30E-10 | 0.10 | 7.99E-24 | 1.60E-13 | 5.82E-44 | 0.073(0.0052)  |
| SQ         |    | rs12443170 | 15 | 76694791 | G | A | 0.87 | 2.53E-06 | 0.44 | 3.29E-16 | 1.80E-06 | 1.46E-25 | 0.076(0.0072)  |
| SQ         |    | rs8042059  | 15 | 76694914 | C | A | 0.28 | 8.00E-10 | 0.08 | 9.18E-24 | 5.38E-14 | 5.06E-44 | -0.072(0.0052) |
| SQ         |    | rs8042374  | 15 | 76695087 | G | A | 0.27 | 6.42E-10 | 0.09 | 1.55E-22 | 1.33E-13 | 1.52E-42 | -0.071(0.0052) |
| SQ         |    | rs4887069  | 15 | 76696125 | G | A | 0.27 | 1.47E-09 | 0.14 | 3.05E-21 | 3.38E-11 | 9.99E-39 | -0.070(0.0054) |
| SQ         |    | rs8040868  | 15 | 76698236 | T | C | 0.60 | 4.67E-18 | 0.64 | 4.75E-09 | 4.86E-22 | 5.90E-44 | -0.073(0.0052) |
| SQ         |    | rs6495309  | 15 | 76702300 | T | C | 0.27 | 4.10E-09 | 0.08 | 2.75E-21 | 6.38E-13 | 4.61E-40 | -0.070(0.0053) |
| SQ         |    | rs17487223 | 15 | 76711042 | T | C | 0.39 | 9.81E-16 | 0.76 | 9.89E-25 | 1.43E-21 | 3.18E-58 | 0.075(0.0046)  |
| SQ         |    | rs12440014 | 15 | 76713781 | G | C | 0.30 | 9.80E-10 | 0.09 | 4.45E-22 | 3.38E-13 | 1.80E-41 | -0.071(0.0053) |
| SQ         |    | rs12441088 | 15 | 76715319 | T | G | 0.71 | 1.09E-08 | 0.03 | 8.91E-21 | 1.82E-08 | 2.40E-34 | 0.068(0.0055)  |
| SQ         |    | rs11636605 | 15 | 76715933 | G | A | 0.80 | 1.66E-07 | 0.21 | 7.44E-16 | 1.11E-06 | 9.08E-27 | 0.062(0.0057)  |
| SQ         |    | rs12441998 | 15 | 76716427 | G | A | 0.26 | 5.47E-08 | 0.27 | 1.44E-15 | 8.19E-07 | 7.02E-27 | -0.062(0.0057) |
| SQ         |    | rs11072768 | 15 | 76716533 | T | G | 0.25 | 1.39E-07 | 0.22 | 1.30E-15 | 7.03E-07 | 1.15E-26 | -0.061(0.0058) |
| SQ         |    | rs1316971  | 15 | 76717565 | G | A | 0.80 | 2.67E-07 | 0.19 | 1.62E-15 | 6.66E-07 | 1.22E-26 | 0.062(0.0058)  |
| SQ         |    | rs9920506  | 15 | 76718112 | G | A | 0.84 | 3.02E-05 | 0.14 | 3.06E-12 | 9.19E-05 | 4.98E-19 | 0.059(0.0067)  |
| SQ         |    | rs11634351 | 15 | 76731773 | G | A | 0.59 | 2.01E-09 | 0.15 | 5.67E-23 | 1.71E-14 | 1.21E-43 | -0.062(0.0045) |
| SQ         |    | rs8023822  | 15 | 76732095 | G | C | 0.79 | 3.24E-05 | 0.23 | 1.78E-09 | 1.11E-02 | 8.27E-14 | 0.041(0.0054)  |
| SQ         |    | rs12594247 | 15 | 76733688 | T | C | 0.22 | 6.64E-07 | 0.33 | 3.88E-11 | 5.10E-04 | 3.70E-18 | -0.053(0.0061) |
| SQ         |    | rs11638830 | 15 | 76735374 | G | C | 0.59 | 2.91E-09 | 0.25 | 1.76E-21 | 4.45E-14 | 2.13E-41 | -0.060(0.0044) |
| SQ         |    | rs4887074  | 15 | 76739165 | G | C | 0.28 | 2.05E-05 | 0.28 | 1.24E-09 | 1.37E-03 | 4.17E-15 | -0.040(0.0051) |
| SQ         |    | rs11072774 | 15 | 76739752 | T | C | 0.23 | 1.69E-06 | 0.40 | 6.50E-12 | 1.71E-05 | 6.71E-21 | -0.058(0.0062) |
| SQ         |    | rs17487514 | 15 | 76740840 | T | C | 0.33 | 6.78E-07 | 0.21 | 5.91E-15 | 1.17E-09 | 1.52E-28 | 0.059(0.0053)  |
| SQ         |    | rs12899135 | 15 | 76741434 | G | A | 0.43 | 3.28E-09 | 0.24 | 1.14E-20 | 4.06E-14 | 8.67E-41 | 0.059(0.0044)  |
| SQ         |    | rs12148319 | 15 | 76743247 | G | A | 0.20 | 8.86E-06 | 0.30 | 1.50E-08 | 7.90E-04 | 7.25E-15 | -0.047(0.0063) |
| SQ         |    | rs1996371  | 15 | 76743861 | T | C | 0.59 | 3.00E-09 | 0.23 | 1.45E-20 | 2.18E-14 | 8.10E-41 | -0.059(0.0044) |
| SQ         |    | rs12594550 | 15 | 76746092 | G | C | 0.22 | 1.50E-06 | 0.46 | 3.67E-08 | 2.06E-04 | 1.28E-15 | -0.050(0.0053) |
| SQ         |    | rs6495314  | 15 | 76747584 | C | A | 0.43 | 3.12E-09 | 0.23 | 8.75E-21 | 1.86E-13 | 5.02E-40 | 0.058(0.0044)  |
| SQ         |    | rs11639372 | 15 | 76753710 | T | C | 0.43 | 3.30E-09 | 0.30 | 2.75E-20 | 2.98E-14 | 1.96E-40 | 0.059(0.0044)  |
| SQ         |    | rs12902602 | 15 | 76754456 | G | A | 0.43 | 3.30E-09 | 0.30 | 2.25E-20 | 2.58E-14 | 1.34E-40 | 0.059(0.0044)  |
| SQ         |    | rs1021071  | 15 | 76755234 | G | C | 0.59 | 2.91E-09 | 0.31 | 2.43E-20 | 2.01E-14 | 9.76E-41 | -0.059(0.0044) |
| SQ         |    | rs11072785 | 15 | 76755284 | T | C | 0.43 | 4.24E-09 | 0.27 | 2.81E-20 | 9.48E-14 | 7.73E-40 | 0.058(0.0044)  |
| SQ         |    | rs11857532 | 15 | 76755323 | T | G | 0.56 | 2.25E-06 | 0.28 | 3.19E-16 | 8.26E-12 | 2.11E-31 | -0.051(0.0045) |
| SQ         |    | rs4886580  | 15 | 76756440 | T | G | 0.59 | 4.09E-09 | 0.28 | 3.76E-20 | 2.29E-14 | 2.25E-40 | -0.059(0.0044) |
| SQ         |    | rs11072787 | 15 | 76760032 | T | C | 0.76 | 4.02E-05 | 0.07 | 2.83E-07 | 8.50E-04 | 5.75E-13 | 0.036(0.0050)  |
| SQ         |    | rs8043123  | 15 | 76760448 | T | C | 0.29 | 6.88E-05 | 0.21 | 3.95E-07 | 1.15E-03 | 1.38E-12 | -0.036(0.0051) |
| SQ         |    | rs4887077  | 15 | 76765419 | T | C | 0.43 | 1.37E-08 | 0.30 | 3.23E-19 | 2.43E-14 | 9.46E-39 | 0.057(0.0044)  |
| SQ         |    | rs11638372 | 15 | 76770614 | T | C | 0.43 | 1.98E-08 | 0.27 | 2.71E-19 | 5.59E-14 | 2.55E-38 | 0.057(0.0044)  |
| SQ         |    | rs922692   | 15 | 76771269 | C | A | 0.59 | 1.08E-08 | 0.26 | 2.29E-19 | 3.49E-14 | 6.60E-39 | -0.057(0.0044) |
| SQ         |    | rs12910627 | 15 | 76781988 | G | C | 0.59 | 1.09E-08 | 0.27 | 1.75E-19 | 2.76E-14 | 2.38E-39 | -0.058(0.0044) |
| SQ         |    | rs11072791 | 15 | 76784131 | C | A | 0.59 | 1.20E-08 | 0.25 | 2.42E-19 | 1.94E-14 | 2.26E-39 | -0.058(0.0044) |
| SQ         |    | rs11638490 | 15 | 76795005 | T | C | 0.43 | 1.24E-08 | 0.28 | 2.75E-19 | 1.84E-14 | 7.11E-39 | 0.058(0.0045)  |
| SQ         |    | rs11629637 | 15 | 76806079 | T | C | 0.43 | 1.76E-08 | 0.22 | 4.13E-19 | 1.52E-14 | 8.09E-39 | 0.058(0.0045)  |
| SQ         |    | rs3813565  | 15 | 76806665 | G | C | 0.42 | 4.04E-09 | 0.15 | 3.36E-20 | 2.68E-14 | 3.41E-40 | 0.062(0.0047)  |
| SQ         |    | rs4887082  | 15 | 76812122 | T | C | 0.59 | 1.70E-08 | 0.26 | 4.36E-18 | 2.16E-13 | 7.27E-37 | -0.035(0.0046) |
| SQ         |    | rs12286    | 15 | 76838814 | G | A | 0.59 | 2.53E-08 | 0.34 | 1.04E-17 | 8.18E-13 | 1.18E-35 | -0.058(0.0046) |
| SQ         |    | rs1809420  | 15 | 76843824 | T | C | 0.58 | 2.11E-05 | 0.37 | 3.28E-17 | 1.74E-11 | 9.54E-31 | -0.055(0.0048) |
| SQ         |    | rs7174367  | 15 | 76851722 | G | A | 0.44 | 4.27E-07 | 0.34 | 5.67E-17 | 4.99E-13 | 1.05E-33 | 0.056(0.0046)  |
| SQ         |    | rs7171916  | 15 | 76855006 | G | C | 0.44 | 1.23E-06 | 0.27 | 1.92E-13 | 2.77E-11 | 3.44E-28 | 0.052(0.0047)  |
| SQ         |    | rs11634042 | 15 | 76892405 | T | C | 0.42 | 1.03E-05 | 0.45 | 5.19E-03 | 1.17E-11 | 1.76E-16 | 0.045(0.0054)  |
| SQ         |    | rs312058   | 19 | 3178102  | T | C | 0.39 | 6.92E-05 | 0.51 | 3.77E-02 | 4.04E-01 | 4.27E-01 | 0.003(0.0042)  |
| SQ         |    | rs4807426  | 19 | 3186188  | G | A | 0.25 | 4.11E-05 | 0.88 | 9.30E-01 | 1.55E-01 | 1.16E-02 | 0.014(0.0055)  |
| SQ         |    | rs312055   | 19 | 3186824  | G | A | 0.30 | 1.46E-05 | 0.85 | 8.12E-01 | 4.97E-01 | 4.98E-02 | 0.003(0.0025)  |
| EVER/NEVER |    | rs1043879  | 1  | 25442668 | T | C | 0.31 | 2.69E-05 | 0.22 | 2.02E-01 | 2.49E-01 | 7.48E-04 | -0.035(0.0104) |
| EVER/NEVER |    | rs590787   | 1  | 25502530 | G | A | 0.41 | 1.88E-05 | 0.63 | 8.78E-01 | 2.37E-01 | 1.04E-03 | -0.045(0.0137) |
| EVER/NEVER |    | rs592372   | 1  | 25508784 | G | A | 0.45 | 3.36E-05 | 0.63 | 5.62E-01 | 1.93E-01 | 2.05E-03 | -0.032(0.0103) |
| EVER/NEVER |    | rs2765572  | 1  | 25529815 | T | G | 0.56 | 2.14E-05 | 0.63 | 4.06E-01 | 2.05E-01 | 3.72E-03 | 0.020(0.0069)  |
| EVER/NEVER |    | rs603958   | 1  | 25532274 | T | C | 0.45 | 2.06E-05 | 0.64 | 3.95E-01 | 2.06E-01 | 3.02E-03 | -0.021(0.0072) |
| EVER/NEVER |    | rs3091242  | 1  | 25547372 | T | C | 0.55 | 1.06E-05 | 0.67 | 1.06E-01 | 2.54E-01 | 1.04E-04 | -0.034(0.0087) |
| EVER/NEVER |    | rs630931   | 1  | 25569602 | G | A | 0.45 | 2.36E-05 | 0.70 | 3.62E-01 | 3.05E-01 | 1.64E-03 | -0.029(0.0092) |
| EVER/NEVER |    | rs2986161  | 1  | 25583768 | T | A | 0.56 | 2.20E-05 | 0.67 | 4.93E-01 | 7.00E-01 | 4.21E-03 | 0.030(0.0105)  |
| EVER/NEVER |    | rs2889044  | 1  | 25622351 | T | G | 0.55 | 1.56E-05 | 0.76 | 4.08E-01 | 2.14E-01 | 9.13E-04 | 0.032(0.0098)  |
| EVER/NEVER | 1  | rs926438   | 1  | 25626225 | T | C | 0.55 | 3.80E-06 | 0.70 | 1.13E-01 | 3.27E-01 | 8.77E-05 | -0.034(0.0086) |
| EVER/NEVER |    | rs909832   | 1  | 25626612 | G | C | 0.44 | 5.41E-06 | 0.69 | 3.44E-01 | 3.68E-01 | 7.42E-04 | -0.032(0.0095) |
| EVER/NEVER |    | rs932372   | 1  | 25627601 | G | A | 0.46 | 1.33E-06 | 0.80 | 5.15E-01 | 4.31E-01 | 3.20E-04 | 0.037(0.0102)  |
| EVER/NEVER |    | rs873308   | 1  | 25631242 | G | A | 0.48 | 6.30E-06 | 0.78 | 9.94E-02 | 3.61E-01 | 1.27E-04 | 0              |

|            |   |            |    |           |   |   |      |          |       |          |          |          |                |
|------------|---|------------|----|-----------|---|---|------|----------|-------|----------|----------|----------|----------------|
| EVER/NEVER | 2 | rs12129264 | 1  | 170407935 | G | A | 0.65 | 8.89E-05 | 0.15  | 6.13E-01 | 2.79E-02 | 5.36E-04 | 0.029(0.0085)  |
| EVER/NEVER |   | rs12139001 | 1  | 170508443 | G | C | 0.96 | 5.56E-05 | 1.00  | 1.19E-01 | 8.79E-02 | 1.14E-05 | -0.321(0.0732) |
| EVER/NEVER |   | rs4619005  | 1  | 170523884 | C | A | 0.96 | 5.99E-05 | 1.00  | 1.29E-01 | 9.12E-02 | 1.38E-05 | -0.319(0.0734) |
| EVER/NEVER |   | rs1894635  | 1  | 170706782 | G | A | 0.95 | 1.71E-05 | 0.81  | 3.04E-01 | 1.59E-01 | 2.22E-04 | -0.135(0.0366) |
| EVER/NEVER |   | rs10179431 | 2  | 3291418   | T | C | 0.82 | 5.46E-05 | 0.82  | 1.53E-01 | 6.94E-01 | 3.70E-03 | 0.032(0.0112)  |
| EVER/NEVER |   | rs7601196  | 2  | 3301291   | G | A | 0.83 | 2.38E-05 | 0.72  | 1.09E-01 | 9.35E-01 | 2.12E-04 | 0.051(0.0136)  |
| EVER/NEVER |   | rs6548153  | 2  | 3305052   | C | A | 0.83 | 1.91E-05 | 0.69  | 1.09E-01 | 9.22E-01 | 1.89E-04 | 0.051(0.0137)  |
| EVER/NEVER | 3 | rs11127408 | 2  | 3308806   | C | A | 0.23 | 1.99E-05 | 0.70  | 9.59E-02 | 9.42E-01 | 1.65E-04 | -0.051(0.0136) |
| EVER/NEVER |   | rs12623700 | 2  | 3312882   | C | A | 0.83 | 2.82E-05 | 0.68  | 8.12E-02 | 9.35E-01 | 1.79E-04 | 0.051(0.0137)  |
| EVER/NEVER |   | rs12623730 | 2  | 3313010   | T | C | 0.23 | 1.95E-05 | 0.70  | 9.18E-02 | 9.44E-01 | 1.36E-04 | -0.053(0.0138) |
| EVER/NEVER |   | rs11127410 | 2  | 3315541   | T | G | 0.83 | 1.93E-05 | 0.70  | 9.18E-02 | 9.92E-01 | 1.25E-04 | 0.053(0.0139)  |
| EVER/NEVER | 4 | rs17388785 | 2  | 84258191  | G | A | 0.74 | 8.49E-06 | 1.00  | 5.28E-01 | 7.60E-01 | 1.31E-03 | 0.041(0.0127)  |
| EVER/NEVER |   | rs7590884  | 2  | 231290542 | C | A | 0.30 | 7.85E-05 | 0.76  | 9.14E-01 | 6.74E-01 | 5.08E-02 | 0.015(0.0079)  |
| EVER/NEVER |   | rs13410153 | 2  | 231304316 | T | G | 0.73 | 4.08E-05 | 0.75  | 7.46E-01 | 5.66E-01 | 2.91E-02 | -0.016(0.0075) |
| EVER/NEVER |   | rs7604147  | 2  | 231306107 | G | A | 0.73 | 4.06E-05 | 0.75  | 7.30E-01 | 6.10E-01 | 2.31E-02 | -0.019(0.0082) |
| EVER/NEVER |   | rs11900671 | 2  | 231312908 | T | G | 0.73 | 4.04E-05 | 0.75  | 7.24E-01 | 5.20E-01 | 1.02E-02 | -0.024(0.0094) |
| EVER/NEVER |   | rs6751037  | 2  | 231317657 | G | A | 0.30 | 3.65E-05 | 0.74  | 7.71E-01 | 6.73E-01 | 1.82E-02 | 0.021(0.0091)  |
| EVER/NEVER |   | rs10498255 | 2  | 231320474 | G | A | 0.30 | 3.70E-05 | 0.69  | 8.22E-01 | 7.40E-01 | 2.65E-02 | 0.020(0.0089)  |
| EVER/NEVER |   | rs13423530 | 2  | 231322572 | C | A | 0.74 | 3.91E-05 | 0.71  | 6.96E-01 | 6.90E-01 | 1.30E-02 | -0.024(0.0096) |
| EVER/NEVER |   | rs6733332  | 2  | 231346384 | T | C | 0.73 | 3.42E-05 | 0.74  | 6.72E-01 | 7.01E-01 | 1.22E-02 | -0.024(0.0095) |
| EVER/NEVER |   | rs6436972  | 2  | 231346873 | G | A | 0.31 | 3.49E-06 | 0.72  | 7.11E-01 | 6.13E-01 | 5.12E-03 | 0.026(0.0095)  |
| EVER/NEVER | 5 | rs6750664  | 2  | 231350715 | G | A | 0.73 | 3.41E-05 | 0.74  | 6.46E-01 | 6.63E-01 | 1.02E-02 | -0.024(0.0091) |
| EVER/NEVER |   | rs3792076  | 2  | 231365282 | T | C | 0.30 | 3.64E-05 | 0.74  | 7.09E-01 | 6.89E-01 | 1.86E-02 | 0.021(0.0088)  |
| EVER/NEVER |   | rs3792074  | 2  | 231374190 | T | C | 0.73 | 3.84E-05 | 0.62  | 5.93E-01 | 6.18E-01 | 1.86E-02 | -0.019(0.0080) |
| EVER/NEVER |   | rs10933358 | 2  | 231399225 | T | G | 0.74 | 2.55E-05 | 0.75  | 4.52E-01 | 6.15E-01 | 7.90E-03 | -0.026(0.0099) |
| EVER/NEVER |   | rs881109   | 2  | 231400929 | G | A | 0.29 | 1.95E-05 | 0.77  | 4.91E-01 | 5.94E-01 | 1.22E-02 | 0.023(0.0090)  |
| EVER/NEVER |   | rs881110   | 2  | 231401056 | G | C | 0.29 | 1.72E-05 | 0.78  | 7.27E-01 | 3.70E-01 | 1.68E-02 | 0.019(0.0080)  |
| EVER/NEVER |   | rs7603732  | 2  | 231406757 | G | A | 0.74 | 2.10E-05 | 0.78  | 6.50E-01 | 5.36E-01 | 1.33E-02 | -0.024(0.0095) |
| EVER/NEVER | 6 | rs17204376 | 3  | 152518651 | T | G | 0.18 | 7.28E-06 | 0.56  | 7.48E-01 | 9.59E-01 | 3.07E-03 | -0.058(0.0195) |
| EVER/NEVER |   | rs6534452  | 4  | 125999314 | T | G | 0.79 | 4.95E-05 | 0.28  | 1.00E-01 | 9.18E-01 | 2.33E-03 | 0.031(0.0101)  |
| EVER/NEVER |   | rs1483597  | 4  | 126001987 | G | A | 0.79 | 5.10E-05 | 0.30  | 1.05E-01 | 9.76E-01 | 2.92E-04 | 0.044(0.0123)  |
| EVER/NEVER |   | rs10222899 | 4  | 126003070 | T | C | 0.24 | 5.70E-05 | 0.26  | 7.07E-02 | 9.16E-01 | 5.14E-02 | -0.013(0.0066) |
| EVER/NEVER |   | rs10010676 | 4  | 126009711 | G | A | 0.26 | 4.61E-05 | 0.27  | 9.95E-02 | 8.85E-01 | 4.91E-04 | -0.040(0.0115) |
| EVER/NEVER |   | rs1395327  | 4  | 126023787 | T | C | 0.26 | 4.31E-05 | 0.21  | 6.27E-02 | 7.75E-01 | 2.18E-04 | -0.042(0.0115) |
| EVER/NEVER |   | rs1395326  | 4  | 126023929 | T | C | 0.21 | 8.91E-05 | 0.20  | 3.44E-02 | 2.70E-01 | 5.56E-02 | -0.019(0.0100) |
| EVER/NEVER | 7 | rs1395325  | 4  | 126023973 | G | A | 0.79 | 4.65E-05 | 0.21  | 6.11E-02 | 8.20E-01 | 2.06E-04 | 0.043(0.0117)  |
| EVER/NEVER |   | rs6857392  | 4  | 126028739 | T | C | 0.78 | 3.54E-05 | 0.32  | 7.94E-02 | 6.57E-01 | 3.81E-04 | 0.038(0.0107)  |
| EVER/NEVER |   | rs1995626  | 4  | 126032025 | T | C | 0.77 | 1.20E-05 | 0.49  | 8.88E-02 | 9.43E-01 | 3.07E-02 | 0.015(0.0068)  |
| EVER/NEVER |   | rs9990572  | 4  | 126034588 | T | C | 0.23 | 2.63E-05 | 0.37  | 5.81E-02 | 9.01E-01 | 9.80E-03 | -0.024(0.0094) |
| EVER/NEVER |   | rs1506547  | 4  | 126047002 | T | C | 0.78 | 3.88E-05 | 0.26  | 6.61E-02 | 6.59E-01 | 1.53E-03 | 0.034(0.0108)  |
| EVER/NEVER |   | rs7679784  | 4  | 126063212 | G | C | 0.27 | 2.22E-05 | 0.28  | 6.00E-02 | 5.89E-01 | 2.10E-03 | -0.032(0.0105) |
| EVER/NEVER |   | rs1979788  | 4  | 126073832 | G | A | 0.32 | 8.38E-05 | 0.09  | 2.18E-01 | 9.71E-01 | 1.40E-03 | -0.036(0.0113) |
| EVER/NEVER |   | rs4417946  | 4  | 176464972 | G | A | 0.14 | 6.35E-05 | 0.84  | 2.24E-01 | 5.79E-02 | 7.03E-05 | -0.117(0.0293) |
| EVER/NEVER |   | rs646077   | 4  | 176467652 | G | A | 0.14 | 6.40E-05 | 0.84  | 2.20E-01 | 5.76E-02 | 6.69E-05 | -0.117(0.0292) |
| EVER/NEVER |   | rs479488   | 4  | 176474518 | T | A | 0.14 | 7.03E-05 | 0.84  | 2.17E-01 | 2.78E-01 | 2.57E-04 | -0.109(0.0299) |
| EVER/NEVER |   | rs13133504 | 4  | 176489960 | T | C | 0.93 | 5.42E-05 | 0.88  | 2.82E-01 | 4.82E-02 | 5.61E-05 | 0.103(0.0256)  |
| EVER/NEVER |   | rs13129016 | 4  | 176494030 | G | A | 0.93 | 5.77E-05 | 0.88  | 3.91E-01 | 4.61E-02 | 9.84E-05 | 0.100(0.0256)  |
| EVER/NEVER |   | rs13135411 | 4  | 176494555 | G | A | 0.90 | 1.06E-05 | 0.92  | 3.42E-01 | 1.22E-01 | 6.31E-05 | 0.100(0.0251)  |
| EVER/NEVER |   | rs13353684 | 4  | 176495124 | G | A | 0.93 | 6.08E-05 | 0.88  | 3.85E-01 | 3.79E-02 | 8.45E-05 | 0.100(0.0255)  |
| EVER/NEVER | 8 | rs13353541 | 4  | 176495512 | T | C | 0.14 | 5.99E-05 | 0.88  | 3.57E-01 | 4.06E-02 | 7.71E-05 | -0.101(0.0256) |
| EVER/NEVER |   | rs13144292 | 4  | 176496417 | T | C | 0.93 | 9.96E-05 | 0.86  | 3.67E-01 | 6.09E-02 | 1.09E-04 | 0.096(0.0249)  |
| EVER/NEVER |   | rs6553864  | 4  | 176497053 | C | A | 0.14 | 6.36E-05 | 0.88  | 3.48E-01 | 4.38E-02 | 7.91E-05 | -0.101(0.0255) |
| EVER/NEVER |   | rs7673648  | 4  | 176497537 | T | C | 0.93 | 6.39E-05 | 0.88  | 3.69E-01 | 4.08E-02 | 8.44E-05 | 0.101(0.0256)  |
| EVER/NEVER |   | rs6820003  | 4  | 176505896 | T | C | 0.14 | 5.45E-05 | 0.88  | 3.38E-01 | 6.00E-02 | 9.28E-05 | -0.100(0.0255) |
| EVER/NEVER |   | rs17716738 | 7  | 127062685 | T | C | 0.83 | 7.60E-05 | 0.03  | 6.78E-01 | 8.19E-01 | 5.80E-02 | -0.023(0.0121) |
| EVER/NEVER |   | rs717944   | 7  | 127200791 | T | C | 0.83 | 3.54E-05 | 0.16  | 8.62E-01 | 9.51E-01 | 1.43E-02 | -0.037(0.0150) |
| EVER/NEVER |   | rs1468700  | 7  | 127245407 | T | C | 0.93 | 2.80E-05 | 0.36  | 1.78E-01 | 6.72E-01 | 1.25E-03 | -0.075(0.0232) |
| EVER/NEVER |   | rs10269552 | 7  | 127284820 | T | C | 0.81 | 2.74E-05 | 0.13  | 7.04E-01 | 7.81E-01 | 1.37E-01 | -0.010(0.0066) |
| EVER/NEVER |   | rs3824000  | 7  | 127290197 | G | A | 0.83 | 3.82E-05 | 0.12  | 6.41E-01 | 8.63E-01 | 7.67E-02 | -0.019(0.0105) |
| EVER/NEVER |   | rs10215276 | 7  | 127296679 | T | C | 0.83 | 3.87E-05 | 0.12  | 6.35E-01 | 8.63E-01 | 2.11E-02 | -0.030(0.0132) |
| EVER/NEVER |   | rs1419969  | 7  | 127301686 | T | A | 0.18 | 2.88E-05 | 0.13  | 6.33E-01 | 8.24E-01 | 2.72E-02 | 0.027(0.0120)  |
| EVER/NEVER |   | rs10255861 | 7  | 127312594 | T | C | 0.17 | 7.09E-05 | 0.15  | 5.59E-01 | 8.79E-01 | 1.55E-02 | 0.033(0.0136)  |
| EVER/NEVER |   | rs3808084  | 7  | 127340261 | G | A | 0.81 | 4.83E-05 | 0.16  | 5.12E-01 | 9.75E-01 | 4.79E-03 | -0.040(0.0141) |
| EVER/NEVER |   | rs3757767  | 7  | 127341343 | G | C | 0.81 | 5.16E-05 | 0.15  | 5.01E-01 | 7.73E-01 | 1.35E-02 | -0.032(0.0129) |
| EVER/NEVER |   | rs4480052  | 7  | 127343949 | C | T | 0.89 | 1.24E-01 | -1.00 | 1.01E-01 | NA       | 1.87E-01 | 0.030(0.0228)  |
| EVER/NEVER |   | rs759056   | 7  | 127349701 | G | A | 0.17 | 5.30E-05 | 0.10  | 4.68E-01 | 9.11E-01 | 8.95E-03 | 0.036(0.0137)  |
| EVER/NEVER | 9 | rs917831   | 7  | 127371844 | T | A | 0.18 | 4.48E-05 | 0.12  | 4.83E-01 | 6.56E-01 | 4.20E-02 | 0.023(0.0113)  |
| EVER/NEVER |   | rs6948493  | 7  | 127373322 | G | A | 0.83 | 4.77E-05 | 0.11  | 4.55E-01 | 9.50E-01 | 4.67E-03 | -0.041(0.0146) |
| EVER/NEVER |   | rs887745   | 7  | 127376989 | T | A | 0.18 | 4.55E-05 | 0.12  | 4.85E-01 | 6.79E-01 | 3.47E-02 | 0.024(0.0116)  |
| EVER/NEVER |   | rs3808073  | 7  | 127381304 | T | A | 0.18 | 4.58E-05 | 0.12  | 4.85E-01 | 7.97E-01 | 1.27E-02 | 0.032(0.0128)  |
| EVER/NEVER |   | rs6963614  | 7  | 127381540 | T | C | 0.82 | 5.82E-05 | 0.10  | 4.60E-01 | 8.04E-01 | 7.73E-02 | -0.018(0.0101) |
| EVER/NEVER |   | rs1362267  | 7  | 127388490 | T | C | 0.81 | 3.54E-05 | 0.16  | 4.92E-01 | 8.05E-01 | 1.03E-02 | -0.033(0.0130) |
| EVER/NEVER |   | rs720300   | 7  | 127394710 | G | A | 0.17 | 4.29E-05 | 0.12  | 3.62E-01 | 9.25E-01 | 2.91E-03 | 0.043(0.0145)  |
| EVER/NEVER |   | rs1193337  | 7  | 127406738 | C | A | 0.82 | 4.04E-05 | 0.12  | 5.02E-01 | 6.99E-01 | 7.17E-02 | -0.019(0.0107) |
| EVER/NEVER |   | rs17676908 | 7  | 127408974 | T | G | 0.82 | 4.02E-05 | 0.12  | 5.00E-01 | 9.57E-01 | 4.13E-03 | -0.043(0.0149) |
| EVER/NEVER |   | rs17676986 | 7  | 127424194 | T | C | 0.18 | 3.15E-05 | 0.16  | 4.18E-01 | 8.75E-01 | 4.05E-03 | 0.040(0.0138)  |
| EVER/NEVER |   | rs1362897  | 7  | 127425939 | G | A | 0.82 | 7.98E-05 | 0.20  | 4.31E-01 | 9.19E-01 | 4.76E-03 | -0.042(0.0148) |
| EVER/NEVER |   | rs17733988 | 7  | 127445029 | G | A | 0.82 | 4.78E-05 | 0.13  | 3.64E-01 | 8.32E-01 | 7.99E-01 | 0.000(0.0002)  |
| EVER/NEVER |   | rs3808058  | 7  | 127455307 | T | C | 0.20 | 2.17E-05 | 0.21  | 4.78E-01 | 9.57E-01 | 3.64E-03 | 0.043(0.0149)  |
| EVER/NEVER |   | rs3757757  | 7  | 127483093 | G | A | 0.86 | 2.34E-05 | 0.20  | 5.72E-01 | 8.52E-01 | 2.27E-02 | -0.026(0.0114) |
| EVER/NEVER |   | rs11598849 | 10 | 55440935  | G | A | 0.74 | 7.20E-05 | 0.03  | 8.17E-01 | 9.05E-01 | 1.61E-02 | -0.027(0.0113) |

|               |            |            |           |           |   |      |          |          |          |          |          |                |                |
|---------------|------------|------------|-----------|-----------|---|------|----------|----------|----------|----------|----------|----------------|----------------|
| EVER/NEVER    | rs11597275 | 10         | 55441007  | T         | A | 0.74 | 8.59E-05 | 0.03     | 7.90E-01 | 8.23E-01 | 3.62E-02 | -0.019(0.0093) |                |
| EVER/NEVER    | rs1911401  | 10         | 55471414  | T         | C | 0.26 | 8.47E-05 | 0.14     | 9.16E-01 | 4.11E-01 | 3.13E-01 | 0.010(0.0097)  |                |
| EVER/NEVER    | rs1911402  | 10         | 55471560  | T         | C | 0.77 | 1.36E-05 | 0.10     | 7.90E-01 | 8.69E-01 | 9.42E-03 | -0.029(0.0111) |                |
| EVER/NEVER    | rs7898152  | 10         | 55473725  | T         | C | 0.77 | 1.38E-05 | 0.13     | 9.50E-01 | 8.68E-01 | 2.07E-02 | -0.025(0.0110) |                |
| EVER/NEVER    | rs2610873  | 10         | 55483294  | G         | A | 0.76 | 5.54E-06 | 0.09     | 9.88E-01 | 9.64E-01 | 1.18E-02 | -0.029(0.0116) |                |
| EVER/NEVER    | rs2660154  | 10         | 55484024  | G         | A | 0.29 | 1.04E-05 | 0.08     | 9.49E-01 | 9.26E-01 | 1.86E-02 | 0.026(0.0112)  |                |
| EVER/NEVER    | rs2660152  | 10         | 55484968  | T         | G | 0.77 | 1.02E-05 | 0.10     | 9.50E-01 | 9.34E-01 | 1.67E-02 | -0.027(0.0114) |                |
| EVER/NEVER    | rs2660151  | 10         | 55485051  | G         | A | 0.29 | 8.95E-06 | 0.08     | 9.48E-01 | 9.37E-01 | 1.56E-02 | 0.028(0.0115)  |                |
| EVER/NEVER    | rs2660150  | 10         | 55485077  | G         | C | 0.77 | 8.92E-06 | 0.08     | 9.50E-01 | 9.37E-01 | 1.55E-02 | -0.028(0.0115) |                |
| EVER/NEVER    | rs12242499 | 10         | 55485858  | T         | C | 0.29 | 8.80E-06 | 0.08     | 9.54E-01 | 9.66E-01 | 1.38E-02 | 0.029(0.0117)  |                |
| EVER/NEVER    | rs12250681 | 10         | 55486796  | G         | A | 0.29 | 8.83E-06 | 0.08     | 9.39E-01 | 9.46E-01 | 1.59E-02 | 0.028(0.0115)  |                |
| EVER/NEVER    | rs12244555 | 10         | 55486903  | T         | C | 0.29 | 8.76E-06 | 0.08     | 9.33E-01 | 9.06E-01 | 2.11E-02 | 0.025(0.0108)  |                |
| EVER/NEVER    | rs11599859 | 10         | 55490206  | T         | C | 0.29 | 6.60E-06 | 0.06     | 8.22E-01 | 9.75E-01 | 1.80E-02 | 0.028(0.0117)  |                |
| EVER/NEVER    | rs11593843 | 10         | 55490462  | T         | C | 0.77 | 6.57E-06 | 0.06     | 8.16E-01 | 9.81E-01 | 1.74E-02 | -0.028(0.0118) |                |
| EVER/NEVER    | rs17643506 | 10         | 55491619  | G         | C | 0.29 | 6.23E-06 | 0.05     | 7.72E-01 | 9.91E-01 | 1.87E-02 | 0.028(0.0119)  |                |
| EVER/NEVER    | rs1911379  | 10         | 55492592  | T         | A | 0.29 | 6.12E-06 | 0.05     | 7.60E-01 | 6.50E-01 | 2.23E-02 | 0.024(0.0105)  |                |
| EVER/NEVER    | rs11594638 | 10         | 55492768  | C         | A | 0.29 | 6.11E-06 | 0.05     | 7.43E-01 | 9.93E-01 | 1.98E-02 | 0.028(0.0119)  |                |
| EVER/NEVER    | rs12257494 | 10         | 55494182  | T         | C | 0.75 | 5.96E-05 | 0.13     | 5.38E-01 | 7.49E-01 | 2.06E-01 | -0.012(0.0094) |                |
| EVER/NEVER    | rs17711275 | 10         | 55495003  | G         | A | 0.30 | 7.40E-05 | 0.15     | 5.24E-01 | 7.39E-01 | 2.35E-01 | 0.011(0.0092)  |                |
| EVER/NEVER    | rs2135715  | 10         | 55495416  | G         | A | 0.75 | 7.48E-05 | 0.15     | 5.27E-01 | 7.26E-01 | 2.52E-01 | -0.010(0.0090) |                |
| EVER/NEVER    | rs3812657  | 10         | 55496476  | G         | A | 0.30 | 7.74E-05 | 0.15     | 5.18E-01 | 7.58E-01 | 2.35E-01 | 0.011(0.0092)  |                |
| EVER/NEVER    | rs11004028 | 10         | 55496819  | G         | A | 0.75 | 7.64E-05 | 0.15     | 5.33E-01 | 7.96E-01 | 2.76E-01 | -0.009(0.0084) |                |
| EVER/NEVER    | rs11004031 | 10         | 55497901  | T         | C | 0.75 | 7.61E-05 | 0.15     | 5.37E-01 | 8.02E-01 | 2.46E-01 | -0.010(0.0087) |                |
| EVER/NEVER    | rs11004032 | 10         | 55497998  | G         | A | 0.75 | 7.64E-05 | 0.15     | 5.41E-01 | 7.47E-01 | 2.40E-01 | -0.011(0.0090) |                |
| EVER/NEVER    | rs11004034 | 10         | 55498247  | T         | C | 0.75 | 4.75E-05 | 0.15     | 5.95E-01 | 6.90E-01 | 2.31E-01 | -0.011(0.0089) |                |
| EVER/NEVER    | rs11004035 | 10         | 55498304  | G         | A | 0.75 | 7.71E-05 | 0.15     | 5.41E-01 | 8.00E-01 | 2.92E-01 | -0.009(0.0081) |                |
| EVER/NEVER    | rs11004036 | 10         | 55498447  | G         | C | 0.75 | 7.75E-05 | 0.15     | 5.46E-01 | 7.54E-01 | 2.38E-01 | -0.011(0.0090) |                |
| EVER/NEVER    | rs17711455 | 10         | 55498752  | G         | A | 0.75 | 7.83E-05 | 0.15     | 5.50E-01 | 8.06E-01 | 2.07E-01 | -0.012(0.0092) |                |
| EVER/NEVER    | rs12256879 | 10         | 55499168  | T         | C | 0.75 | 7.93E-05 | 0.15     | 5.56E-01 | 7.53E-01 | 2.44E-01 | -0.010(0.0089) |                |
| EVER/NEVER    | rs12256947 | 10         | 55499300  | T         | A | 0.75 | 7.96E-05 | 0.15     | 5.60E-01 | 7.36E-01 | 3.92E-01 | -0.006(0.0073) |                |
| EVER/NEVER    | rs12257012 | 10         | 55499412  | T         | G | 0.75 | 7.99E-05 | 0.15     | 5.55E-01 | 7.89E-01 | 1.68E-01 | -0.014(0.0099) |                |
| EVER/NEVER    | rs11594564 | 10         | 55501158  | T         | C | 0.30 | 4.69E-05 | 0.19     | 6.14E-01 | 7.81E-01 | 1.29E-01 | 0.015(0.0101)  |                |
| EVER/NEVER    | rs17644196 | 10         | 55515239  | C         | A | 0.30 | 7.49E-05 | 0.16     | 7.66E-01 | 6.65E-01 | 2.32E-01 | 0.010(0.0085)  |                |
| EVER/NEVER    | rs3934925  | 10         | 133445678 | G         | A | 0.56 | 6.51E-06 | 0.69     | 8.21E-01 | 1.17E-01 | 4.18E-03 | 0.024(0.0085)  |                |
| EVER/NEVER    | rs4243519  | 10         | 133445953 | T         | C | 0.55 | 1.28E-05 | 0.56     | 8.28E-01 | 2.00E-01 | 8.07E-03 | 0.022(0.0085)  |                |
| EVER/NEVER    | rs4897737  | 10         | 133446221 | G         | A | 0.45 | 5.99E-06 | 0.70     | 8.15E-01 | 1.37E-01 | 4.87E-03 | -0.024(0.0085) |                |
| EVER/NEVER    | rs9419657  | 10         | 133446938 | T         | G | 0.55 | 7.29E-06 | 0.60     | 9.76E-01 | 7.96E-02 | 2.03E-03 | 0.025(0.0083)  |                |
| EVER/NEVER    | rs9419659  | 10         | 133448102 | C         | A | 0.46 | 6.30E-06 | 0.63     | 8.40E-01 | 1.00E-01 | 3.55E-03 | -0.025(0.0087) |                |
| EVER/NEVER    | rs4611133  | 10         | 133449692 | T         | C | 0.40 | 1.58E-05 | 0.20     | 2.31E-01 | 2.86E-01 | 1.23E-03 | 0.027(0.0084)  |                |
| EVER/NEVER    | rs4897777  | 10         | 133453004 | G         | A | 0.43 | 4.10E-05 | 0.66     | 5.06E-01 | 1.18E-01 | 1.66E-02 | -0.020(0.0085) |                |
| EVER/NEVER    | rs10782372 | 10         | 133453921 | G         | C | 0.45 | 7.06E-06 | 0.71     | 8.81E-01 | 1.37E-01 | 4.17E-03 | -0.024(0.0084) |                |
| EVER/NEVER    | rs9419597  | 10         | 133455875 | G         | A | 0.45 | 8.00E-06 | 0.72     | 8.66E-01 | 1.93E-01 | 6.02E-03 | -0.024(0.0087) |                |
| EVER/NEVER    | rs9419598  | 10         | 133455938 | G         | A | 0.56 | 8.02E-06 | 0.72     | 8.47E-01 | 1.31E-01 | 4.58E-03 | 0.024(0.0086)  |                |
| EVER/NEVER    | rs4897779  | 10         | 133456135 | T         | C | 0.56 | 7.52E-06 | 0.75     | 8.01E-01 | 1.25E-01 | 4.88E-03 | 0.024(0.0086)  |                |
| EVER/NEVER    | rs4897780  | 10         | 133456569 | G         | A | 0.45 | 8.90E-06 | 0.70     | 8.12E-01 | 1.17E-01 | 4.72E-03 | -0.024(0.0085) |                |
| EVER/NEVER    | rs4897781  | 10         | 133457894 | G         | A | 0.45 | 2.14E-06 | 0.60     | 5.88E-01 | 2.05E-01 | 1.03E-02 | -0.022(0.0085) |                |
| EVER/NEVER    | rs4897740  | 10         | 133457937 | T         | G | 0.46 | 3.94E-07 | 0.40     | 8.43E-01 | 2.40E-01 | 3.50E-03 | -0.026(0.0087) |                |
| EVER/NEVER    | rs4897741  | 10         | 133458200 | G         | A | 0.56 | 2.73E-06 | 0.58     | 5.59E-01 | 3.06E-01 | 1.72E-02 | 0.020(0.0084)  |                |
| EVER/NEVER    | rs4897783  | 10         | 133458227 | G         | A | 0.51 | 9.08E-05 | 0.63     | 3.97E-01 | 2.47E-01 | 5.45E-02 | -0.017(0.0088) |                |
| EVER/NEVER    | rs4897787  | 10         | 133462630 | T         | G | 0.56 | 1.01E-06 | 0.64     | 6.02E-01 | 2.30E-01 | 8.04E-03 | 0.022(0.0084)  |                |
| EVER/NEVER    | rs4897788  | 10         | 133463721 | T         | C | 0.46 | 1.68E-06 | 0.65     | 6.12E-01 | 2.98E-01 | 1.10E-02 | -0.022(0.0087) |                |
| EVER/NEVER    | rs4897748  | 10         | 133464425 | T         | C | 0.45 | 1.23E-06 | 0.63     | 6.11E-01 | 2.87E-01 | 1.00E-02 | -0.022(0.0085) |                |
| EVER/NEVER    | rs9419603  | 10         | 133470399 | G         | A | 0.56 | 1.37E-06 | 0.62     | 5.47E-01 | 2.22E-01 | 9.99E-03 | 0.022(0.0085)  |                |
| EVER/NEVER    | rs9419662  | 10         | 133481621 | T         | C | 0.49 | 8.61E-05 | 0.79     | 3.10E-01 | 1.89E-01 | 6.11E-02 | 0.016(0.0085)  |                |
| EVER/NEVER    | rs9419604  | 10         | 133482769 | T         | C | 0.56 | 1.79E-06 | 0.58     | 3.44E-01 | 2.53E-01 | 2.38E-02 | 0.019(0.0085)  |                |
| EVER/NEVER    | rs7095118  | 10         | 133484512 | T         | C | 0.45 | 1.37E-06 | 0.60     | 3.68E-01 | 3.43E-01 | 2.60E-02 | -0.018(0.0083) |                |
| EVER/NEVER    | rs11601812 | 11         | 98114603  | T         | C | 0.18 | 7.77E-05 | 0.86     | 8.67E-02 | 1.35E-01 | 1.30E-02 | -0.043(0.0173) |                |
| EVER/NEVER    | rs11217132 | 11         | 98208304  | G         | C | 0.88 | 2.10E-05 | 0.87     | 5.56E-01 | 8.54E-02 | 5.29E-02 | 0.036(0.0188)  |                |
| EVER/NEVER    | rs17301608 | 16         | 54076111  | T         | C | 0.40 | 6.72E-05 | 0.90     | 4.63E-01 | 1.65E-01 | 1.35E-03 | -0.029(0.0091) |                |
| EVER/NEVER    | rs2241145  | 16         | 54079701  | G         | C | 0.55 | 1.42E-05 | 0.74     | 5.18E-01 | 3.52E-02 | 2.48E-04 | 0.031(0.0086)  |                |
| EVER/NEVER    | rs9928731  | 16         | 54080512  | T         | C | 0.55 | 1.48E-05 | 0.74     | 5.35E-01 | 1.20E-02 | 1.14E-04 | 0.033(0.0085)  |                |
| EVER/NEVER    | rs243847   | 16         | 54081499  | T         | C | 0.57 | 8.43E-05 | 0.89     | 4.73E-01 | 5.30E-01 | 8.68E-02 | -0.014(0.0084) |                |
| EVER/NEVER    | rs243845   | 16         | 54083988  | G         | A | 0.59 | 8.27E-06 | 0.54     | 9.13E-01 | 2.97E-01 | 7.65E-03 | -0.024(0.0089) |                |
| EVER/NEVER    | rs243844   | 16         | 54084377  | G         | A | 0.60 | 4.32E-06 | 0.52     | 7.42E-01 | 1.36E-01 | 5.30E-03 | -0.024(0.0087) |                |
| EVER/NEVER    | rs243842   | 16         | 54084923  | T         | C | 0.60 | 2.98E-06 | 0.52     | 8.56E-01 | 2.43E-01 | 5.65E-03 | -0.024(0.0088) |                |
| EVER/NEVER    | rs11906241 | 20         | 18542013  | T         | C | 0.12 | 2.31E-05 | 0.49     | 7.17E-01 | 1.66E-01 | 1.06E-01 | -0.059(0.0365) |                |
| EVER/NEVER    | rs11905596 | 20         | 18544188  | T         | G | 0.96 | 2.27E-05 | 0.45     | 6.65E-01 | 1.88E-01 | 1.03E-01 | 0.060(0.0370)  |                |
| EVER/NEVER    | rs11905496 | 20         | 18558666  | C         | A | 0.96 | 2.24E-05 | 0.42     | 6.66E-01 | 2.19E-01 | 9.04E-02 | 0.063(0.0373)  |                |
| EVER/NEVER    | rs4381841  | 20         | 18571118  | T         | G | 0.12 | 2.18E-05 | 0.37     | 6.52E-01 | 3.15E-01 | 7.30E-02 | -0.067(0.0374) |                |
| EVER/NEVER    | rs16979446 | 20         | 18573054  | G         | A | 0.95 | 2.67E-05 | 0.57     | 6.65E-01 | 3.22E-01 | 5.82E-02 | 0.070(0.0367)  |                |
| EVER/NEVER    | rs10485583 | 20         | 18598214  | G         | A | 0.96 | 7.30E-05 | 0.47     | 5.85E-08 | 3.82E-01 | 3.19E-04 | -0.104(0.0288) |                |
| EVER/NEVER    | rs2824775  | 21         | 18661002  | T         | G | 0.32 | 8.89E-05 | 0.73     | 4.25E-01 | 5.31E-01 | 3.47E-01 | 0.002(0.0026)  |                |
| EVER/NEVER    | rs2824776  | 21         | 18661665  | G         | C | 0.32 | 9.03E-05 | 0.75     | 1.00E-01 | 2.66E-01 | 7.24E-01 | 0.004(0.0103)  |                |
| EVER/NEVER    | rs2824780  | 21         | 18663988  | G         | A | 0.32 | 9.73E-05 | 0.73     | 3.86E-01 | 5.18E-01 | 5.23E-01 | 0.000(0.0001)  |                |
| EVER/NEVER    | rs2824781  | 21         | 18665777  | G         | A | 0.33 | 1.77E-05 | 0.73     | 2.52E-01 | 6.95E-01 | 5.74E-01 | 0.001(0.0013)  |                |
| EVER/NEVER    | rs1888409  | 21         | 18676291  | G         | A | 0.70 | 2.16E-05 | 0.71     | 2.45E-01 | 5.42E-01 | 8.07E-01 | 0.001(0.0027)  |                |
| EVER/NEVER    | rs1888410  | 21         | 18676377  | T         | C | 0.70 | 2.16E-05 | 0.71     | 2.46E-01 | 5.49E-01 | 8.22E-01 | 0.001(0.0028)  |                |
| EVER/NEVER    | rs2824794  | 21         | 18681764  | T         | G | 0.70 | 1.71E-05 | 0.69     | 2.63E-01 | 7.16E-01 | 2.68E-01 | -0.007(0.0060) |                |
| Curr/Non-curr | 1          | rs6688471  | 1         | 20158901  | C | T    | 0.18     | 2.73E-05 | 0.76     | 9.02E-01 | NA       | 1.14E-03       | 0.154(0.0472)  |
| Curr/Non-curr | 2          | rs12125644 | 1         | 196310793 | A | C    | 0.25     | 5.87E-05 | 0.13     | 4.79E-01 | NA       | 1.02E-03       | -0.079(0.0239) |
| Curr/Non-curr | 3          | rs17008389 | 3         | 71366206  | A | T    | 0.38     | 1.68E-05 | 0.66     | 2.33E-01 | NA       | 2.47E-04       | -0.053(0.0146) |
| Curr/Non-curr | 4          | rs7677847  | 4         | 77583150  | A | G    | 0.35     | 1.02E-05 | 0.78     | 4.70E-01 | NA       | 8.61E-04       | 0.049(0.0148)  |



Supplementary Table 3. Genomic control lambda inflation factors

| Study Name                                            | Other Name   | GC lambda inflation factor |                        |           |
|-------------------------------------------------------|--------------|----------------------------|------------------------|-----------|
|                                                       |              | Ever vs Never              | Current vs Non-current | CPD       |
| The arc Epidemiology Unit Rheumatoid Arthritis cohort | WTCCC-RA     | n/a                        | 0.993213               | n/a       |
| The EPIC Obesity study                                | EPIC         | 1.012                      | 0.9948708              | n/a       |
| The BRIGHT Study                                      | WTCCC-HT     | n/a                        | 1.00569                | 1.000426  |
| The GEMS Study                                        | GEMS         | 1.013301                   | 0.9955785              | 1.019739  |
| The Bergen COPD case control collection               | GSK-COPD     | n/a                        | 0.9855785              | 0.9960527 |
| The GSK/IOP/CAMH bipolar cohort                       | GSK-BIPOLAR  | 0.9961354                  | 0.9997034              | 1.003575  |
| The GSK/MPI depression cohort                         | GSK-UNIPOLAR | 1.010012                   | 1.010608               | 1.012388  |
| The UK IBD Genetics Consortium                        | WTCCC-IBD    | 1.004875                   | 1.008234               | n/a       |
| The KORA Study                                        | KORA         | 1.027964                   | 0.9975758              | 1.030356  |
| The KORCULA Study                                     | KORCULA      | 1.072233                   | 1.037129               | n/a       |
| The LOLIPOP Study                                     | LOLIPOP      | 1.026318                   | 1.008084               | 1.008873  |
| The Medstar Cohort                                    | MEDSTAR      | 0.9924291                  | 0.9961729              | 1.009704  |
| The Orkney Complex Disease Study                      | ORCADES      | 1.128765                   | 1.079304               | n/a       |
| The PennCATH cohort                                   | PENNCATH     | n/a                        | 0.951226               | n/a       |
| The Popgen Biobank Study                              | POPGEN       | 1.018822                   | n/a                    | 1.035871  |
| The PsyCoLaus cohort                                  | CoLaus       | 1.019417                   | 1.012127               | 1.0131102 |
| The SardNIA study                                     | SardiNIA     | 1.135018                   | 1.097244               | 1.088316  |
| The Study of Health in Pomerania                      | SHIP         | 1.000568                   | 1.022989               | 1.006505  |
| The VIS Study                                         | VIS          | 1.055634                   | 1.03443                | n/a       |
| The WTCCC-CAD cohort                                  | WTCCC-CAD    | 1.009498                   | 0.9964745              | 1.010912  |
| COMBINED                                              |              | 1.002404                   | 0.9982071              | 1.014531  |

## **SUPPLEMENTARY NOTE**

### **Comparison of SQ and CPD phenotype**

We also carried out the meta-analysis of our cohort using CPD as the phenotype as this was used by the ENGAGE study. The manhattan plot for the genome-wide screen is shown in Figure S13. This clearly highlights the chromosome 15 region but the p-values are not as significant as those obtained when using SQ as the phenotype (rs1051730 has a p-value of 4.65E-16 for the CPD phenotype but 9.45E-19 for the SQ phenotype). Figure S14 shows the chromosome 15 region in more detail and shows that the top 5 SNPs are the same for both phenotypes but that there is a slight change in the order of the SNPs. This effect can be explained by the discrete nature of the SQ phenotype i.e the SQ level 3 is defined as all values of CPD of 31 or more so that the upper tail of the CPD distribution is effectively truncated. When using CPD as the phenotype individuals with high values of CPD, such as outlying observations, may elevate the residual variance of the phenotype which will tend to reduce the significance of associations. The use of the SQ phenotype will be more robust to this effect.

### **Acknowledgements for individual cohorts**

**GSK Bipolar:** We thank the participants who donated their time and DNA to make this study possible; the staff at the recruiting sites in London, Toronto, and Dundee, and at GlaxoSmithKline for contributions to recruitment and study management.

**The EPIC-Obesity Study:** The EPIC Norfolk Study is funded by program grants from the Medical Research Council UK and Cancer Research UK; and by additional support from the European Union; Stroke Association; British Heart Foundation; Department of Health; Food Standards Agency; and the Wellcome Trust.

**KORA:** HEW is supported by the German Federal Ministry of Education and Research (BMBF) in the context of the German National Genome Research Network (NGFN-2 and NGFN-plus). The KORA research platform was initiated and financed by the Helmholtz Center Munich, German Research Center for Environmental Health, which is funded by the German Federal Ministry of Education and Research and by the State of Bavaria. Our research was supported within the Munich Center of Health Sciences (MC Health) as part of LMUinnovativ.

**GSK UPD:** We would like to acknowledge all the participants in the study. We would like to thank numerous people at GSK and Max-Planck Institute, BKH Augsburg and Klinikum Ingolstadt in Germany who have contributed to this project.

The CoLaus study was supported by grants from the faculty of Biology and Medicine of Lausanne, Switzerland, the Swiss National Science Foundation (#3200B0–105993, #32003B-118308 and #33CSCO–122661) and from GlaxoSmithKline (Psychiatry Center of Excellence for Drug Discovery and Genetics Division, Drug Discovery - Verona, R&D). The authors would like to express their gratitude to the Lausanne inhabitants who volunteered to participate in the CoLaus study. We would also like to thank all the investigators who have contributed to the recruitment, as well as many GSK employees who contributed to the execution of this study including Yolande Barreau, Mathieu Firmann, Vladimir Mayor, Anne–Lise Bastian, Binasa Ramic, Martine Moranville, Martine Baumer, Marcy Sagette, Jeanne Ecoffey, Sylvie Mermoud, Marie-Louise Matthey, Christiane Shalofsky, Georgette Jungo, Stéphane Rothen, Lajos Oros and Gioia Rocca.

Recruitment of PennCATH was supported by the Cardiovascular Institute of the University of Pennsylvania. Recruitment of the MedStar sample was supported in part by the MedStar Research Institute and the Washington Hospital Center and a research grant from GlaxoSmithKline. Genotyping of PennCATH and Medstar was performed at the Center for Applied Genomics at the Children’s Hospital of Philadelphia and supported by GlaxoSmithKline through an Alternate Drug Discovery Initiative research alliance award (M. P. R. and D. J. R.) with the University of Pennsylvania School of Medicine.

The SardiNIA project is supported in part by the Intramural Research Program of the NIH, National Institute on Aging. We would like to thank SardiNIA study participants for their volunteerism and the local civil and religious authorities in SardiNIA for their support.

SHIP is part of the Community Medicine Research net of the University of Greifswald, Germany, which is funded by the Federal Ministry of Education and Research (grants no. 01ZZ9603, 01ZZ0103, and 01ZZ0403), the Ministry of Cultural Affairs and the Social Ministry of the Federal State of Mecklenburg-West Pomerania. Genome-wide data have been supported by the Federal Ministry of Education and Research (grant no. 03ZIK012) and a joint grant from Siemens Healthcare, Erlangen, Germany and the Federal State of Mecklenburg-West Pomerania. The University of Greifswald is a member of the ‘Center of Knowledge Interchange’ program of the Siemens AG.

Authors gratefully acknowledge the assistance for the Bergen case-control study: Trude Duellen Skorge, Borghild Hovland, Marianne Salomonsen, Tina Endresen, Rita Opeland, Gunn Nøstdal and Meera Gummaraja of the Institute of Medicine, University of Bergen and Mark Hall, Sandra Hammond, Rachel Taylor, Sara Alalouf and Santhi Subramanian of GlaxoSmithKline for data management support.

BRIGHT study: We are extremely grateful to all the patients who participated in the study and the nursing team. The BRIGHT study is supported by the Medical Research Council of Great Britain and the British Heart Foundation. Professor Dominiczak is a British Heart Foundation Chairholder. This work forms part of the research themes contributing to the translational research portfolio of Barts and the London Cardiovascular Biomedical Research Unit which is supported and funded by the National Institute of Health Research.



ORCADES was supported by the Chief Scientist Office of the Scottish Government, the Royal Society and the European Union framework program 6 EUROSPAN project (contract no. LSHG-CT-2006-018947). DNA extractions were performed at the Wellcome Trust Clinical Research Facility in Edinburgh. We would like to acknowledge the invaluable contributions of Lorraine Anderson and the research nurses in Orkney, the administrative team in Edinburgh and the people of Orkney.

The Vis study in the Croatian island of Vis was supported through the grants from the Medical Research Council UK, the Ministry of Science, Education and Sport of the Republic of Croatia to I.R. (number 108-1080315-0302) and the European Union framework program 6 EUROSPAN project (contract no. LSHG-CT-2006-018947). We would like to acknowledge the invaluable contributions of the recruitment team (including those from the Institute of Anthropological Research in Zagreb) in Vis, the administrative teams in Croatia and Edinburgh (Rosa Bisset) and the people of Vis.

The Korcula study in the Croatian island of Vis was supported through the grants from the Medical Research Council UK and the Ministry of Science, Education and Sport of the Republic of Croatia to I.R. (number 108-1080315-0302). We would like to acknowledge the invaluable contributions of the recruitment team in Korcula, the administrative teams in Croatia and Edinburgh (Rosa Bisset) and the people of Korcula.

Recruitment of the WTCCC-CAD cases was funded by the British Heart Foundation and the UK Medical Research Council and the GWAS study by the Wellcome Trust. N.J.S. holds a chair funded by the British Heart Foundation.

POPGEN: This study was supported by the German Ministry of Education and Research (BMBF) through the National Genome Research Network (NGFN) and the project received infrastructure support through the DFG excellence cluster "Inflammation at Interfaces".

WTCCC-CD : We thank all Crohn's disease subjects who contributed samples, and consultants and nursing staff across the UK who helped with recruitment of study subjects. Case collections were supported by the National Association for Colitis and Crohn's disease (NACC), the Wellcome Trust, the Medical Research Council UK. We also acknowledge support from the Department of Health via the National Institute for Health Research (NIHR) comprehensive Biomedical Research Centre awards to Guy's & St Thomas' NHS Foundation Trust in partnership with King's College London and to the Cambridge University Hospitals NHS Foundation Trust in partnership with the University of Cambridge School of Clinical Medicine.

Collection of samples for the WTCCC-RA cohort was funded by The Arthritis Research Campaign. We are grateful to the patients, rheumatologists, nurses and laboratory staff who contributed to the ascertainment and preparation of these samples.

This study makes use of data generated by the Wellcome Trust Case Control Consortium. A full list of the investigators who contributed to the generation of the data is available from [www.wtccc.org.uk](http://www.wtccc.org.uk). Funding for the project was provided by the Wellcome Trust under award 076113.

**Membership of the Wellcome Trust Case Control Consortium (60. In the author list annotation):**

**Management Committee:** Paul R Burton<sup>1</sup>, David G Clayton<sup>2</sup>, Lon R Cardon<sup>3</sup>, Nick Craddock<sup>4</sup>, Panos Deloukas<sup>5</sup>, Audrey Duncanson<sup>6</sup>, Dominic P Kwiatkowski<sup>3,5</sup>, Mark I McCarthy<sup>3,7</sup>, Willem H Ouwehand<sup>8,9</sup>, Nilesh J Samani<sup>10</sup>, John A Todd<sup>2</sup>, Peter Donnelly (Chair)<sup>11</sup>

**Data and Analysis Committee:** Jeffrey C Barrett<sup>3</sup>, Paul R Burton<sup>1</sup>, Dan Davison<sup>11</sup>, Peter Donnelly<sup>11</sup>, Doug Easton<sup>12</sup>, David M. Evans<sup>3</sup>, Hin-Tak Leung<sup>2</sup>, Jonathan L Marchini<sup>11</sup>, Andrew P Morris<sup>3</sup>, Chris CA Spencer<sup>11</sup>, Martin D Tobin<sup>1</sup>, Lon R Cardon (Co-chair)<sup>3</sup>, David G Clayton (Co-chair)<sup>2</sup>

**UK Blood Services & University of Cambridge Controls:** Antony P Attwood<sup>5,8</sup>, James P Boorman<sup>8,9</sup>, Barbara Cant<sup>8</sup>, Ursula Everson<sup>13</sup>, Judith M Hussey<sup>14</sup>, Jennifer D Jolley<sup>8</sup>, Alexandra S Knight<sup>8</sup>, Kerstin Koch<sup>8</sup>, Elizabeth Meech<sup>15</sup>, Sarah Nutland<sup>2</sup>, Christopher V Prowse<sup>16</sup>, Helen E Stevens<sup>2</sup>, Niall C Taylor<sup>8</sup>, Graham R Walters<sup>17</sup>, Neil M Walker<sup>2</sup>, Nicholas A Watkins<sup>8,9</sup>, Thilo Winzer<sup>8</sup>, John A Todd<sup>2</sup>, Willem H Ouwehand<sup>8,9</sup>

**1958 Birth Cohort Controls:** Richard W Jones<sup>18</sup>, Wendy L McArdle<sup>18</sup>, Susan M Ring<sup>18</sup>, David P Strachan<sup>19</sup>, Marcus Pembrey<sup>18,20</sup>

**Bipolar Disorder (Aberdeen):** Gerome Breen<sup>21</sup>, David St Clair<sup>21</sup>; **(Birmingham):** Sian Caesar<sup>22</sup>, Katherine Gordon-Smith<sup>22,23</sup>, Lisa Jones<sup>22</sup>; **(Cardiff):** Christine Fraser<sup>23</sup>, Elaine K Green<sup>23</sup>, Detelina Grozeva<sup>23</sup>, Marian L Hamshere<sup>23</sup>, Peter A Holmans<sup>23</sup>, Ian R Jones<sup>23</sup>, George Kirov<sup>23</sup>, Valentina Moskvina<sup>23</sup>, Ivan Nikolov<sup>23</sup>, Michael C O'Donovan<sup>23</sup>, Michael J Owen<sup>23</sup>, Nick Craddock<sup>23</sup>; **(London):** David A Collier<sup>24</sup>, Amanda Elkin<sup>24</sup>, Anne Farmer<sup>24</sup>, Richard Williamson<sup>24</sup>, Peter McGuffin<sup>24</sup>; **(Newcastle):** Allan H Young<sup>25</sup>, I Nicol Ferrier<sup>25</sup>

**Coronary Artery Disease (Leeds):** Stephen G Ball<sup>26</sup>, Anthony J Balmforth<sup>26</sup>, Jennifer H Barrett<sup>26</sup>, D Timothy Bishop<sup>26</sup>, Mark M Iles<sup>26</sup>, Azhar Maqbool<sup>26</sup>, Nadira Yuldasheva<sup>26</sup>, Alistair S Hall<sup>26</sup>; **(Leicester):** Peter S Braund<sup>10</sup>, Paul R Burton<sup>1</sup>, Richard J Dixon<sup>10</sup>, Massimo Mangino<sup>10</sup>, Suzanne Stevens<sup>10</sup>, Martin D Tobin<sup>1</sup>, John R Thompson<sup>1</sup>, Nilesh J Samani<sup>10</sup>

**Crohn's Disease (Cambridge):** Francesca Bredin<sup>27</sup>, Mark Tremelling<sup>27</sup>, Miles Parkes<sup>27</sup>; **(Edinburgh):** Hazel Drummond<sup>28</sup>, Charles W Lees<sup>28</sup>, Elaine R Nimmo<sup>28</sup>, Jack Satsangi<sup>28</sup>; **(London):** Sheila A Fisher<sup>29</sup>, Alastair Forbes<sup>30</sup>, Cathryn M Lewis<sup>29</sup>, Clive M Onnie<sup>29</sup>, Natalie J Prescott<sup>29</sup>, Jeremy Sanderson<sup>31</sup>, Christopher G Mathew<sup>29</sup>; **(Newcastle):** Jamie Barbour<sup>32</sup>, M Khalid Mohiuddin<sup>32</sup>, Catherine E Todhunter<sup>32</sup>, John C Mansfield<sup>32</sup>; **(Oxford):** Tariq Ahmad<sup>33</sup>, Fraser R Cummings<sup>33</sup>, Derek P Jewell<sup>33</sup>

**Hypertension (Aberdeen):** John Webster<sup>34</sup>; **(Cambridge):** Morris J Brown<sup>35</sup>, David G Clayton<sup>2</sup>; **(Evry, France):** G Mark Lathrop<sup>36</sup>; **(Glasgow):** John Connell<sup>37</sup>, Anna Dominiczak<sup>37</sup>; **(Leicester):** Nilesh J Samani<sup>10</sup>; **(London):** Carolina A Braga Marciano<sup>38</sup>, Beverley Burke<sup>38</sup>, Richard Dobson<sup>38</sup>, Johannie Gungadoo<sup>38</sup>, Kate L Lee<sup>38</sup>, Patricia B Munroe<sup>38</sup>, Stephen J Newhouse<sup>38</sup>, Abiodun Onipinla<sup>38</sup>, Chris Wallace<sup>38</sup>, Mingzhan Xue<sup>38</sup>, Mark Caulfield<sup>38</sup>; **(Oxford):** Martin Farrall<sup>39</sup>

**Rheumatoid Arthritis:** Anne Barton<sup>40</sup>, Ian N Bruce<sup>40</sup>, Hannah Donovan<sup>40</sup>, Steve Eyre<sup>40</sup>, Paul D Gilbert<sup>40</sup>, Samantha L Hider<sup>40</sup>, Anne M Hinks<sup>40</sup>, Sally L John<sup>40</sup>, Catherine Potter<sup>40</sup>, Alan J Silman<sup>40</sup>, Deborah PM Symmons<sup>40</sup>, Wendy Thomson<sup>40</sup>, Jane Worthington<sup>40</sup>

**Type 1 Diabetes:** David G Clayton<sup>2</sup>, David B Dunger<sup>2,41</sup>, Sarah Nutland<sup>2</sup>, Helen E Stevens<sup>2</sup>, Neil M Walker<sup>2</sup>, Barry Widmer<sup>2,41</sup>, John A Todd<sup>2</sup>

**Type 2 Diabetes (Exeter):** Timothy M Frayling<sup>42,43</sup>, Rachel M Freathy<sup>42,43</sup>, Hana Lango<sup>42,43</sup>, John R B Perry<sup>42,43</sup>, Beverley M Shields<sup>43</sup>, Michael N Weedon<sup>42,43</sup>, Andrew T Hattersley<sup>42,43</sup>; **(London):** Graham A Hitman<sup>44</sup>; **(Newcastle):** Mark Walker<sup>45</sup>; **(Oxford):** Kate S Elliott<sup>3,7</sup>, Christopher J Groves<sup>7</sup>, Cecilia M Lindgren<sup>3,7</sup>, Nigel W Rayner<sup>3,7</sup>, Nicholas J Timpson<sup>3,46</sup>, Eleftheria Zeggini<sup>3,7</sup>, Mark I McCarthy<sup>3,7</sup>

**Tuberculosis (Gambia):** Melanie Newport<sup>47</sup>, Giorgio Sirugo<sup>47</sup>; **(Oxford):** Emily Lyons<sup>3</sup>, Fredrik Vannberg<sup>3</sup>, Adrian VS Hill<sup>3</sup>

**Ankylosing Spondylitis:** Linda A Bradbury<sup>48</sup>, Claire Farrar<sup>49</sup>, Jennifer J Pointon<sup>48</sup>, Paul Wordsworth<sup>49</sup>, Matthew A Brown<sup>48,49</sup>

**AutoImmune Thyroid Disease:** Jayne A Franklyn<sup>50</sup>, Joanne M Heward<sup>50</sup>, Matthew J Simmonds<sup>50</sup>, Stephen CL Gough<sup>50</sup>

**Breast Cancer:** Sheila Seal<sup>51</sup>, Michael R Stratton<sup>51,52</sup>, Nazneen Rahman<sup>51</sup>

**Multiple Sclerosis:** Maria Ban<sup>53</sup>, An Goris<sup>53</sup>, Stephen J Sawcer<sup>53</sup>, Alastair Compston<sup>53</sup>

**Gambian Controls (Gambia):** David Conway<sup>47</sup>, Muminatou Jallow<sup>47</sup>, Melanie Newport<sup>47</sup>, Giorgio Sirugo<sup>47</sup>; **(Oxford):** Kirk A Rockett<sup>3</sup>, Dominic P Kwiatkowski<sup>3,5</sup>

**DNA, Genotyping, Data QC and Informatics (Wellcome Trust Sanger Institute, Hinxton):** Suzannah J Bumpstead<sup>5</sup>, Amy Chaney<sup>5</sup>, Kate Downes<sup>2,5</sup>, Mohammed JR Ghori<sup>5</sup>, Rhian Gwilliam<sup>5</sup>, Sarah E Hunt<sup>5</sup>, Michael Inouye<sup>5</sup>, Andrew Keniry<sup>5</sup>, Emma King<sup>5</sup>, Ralph McGinnis<sup>5</sup>, Simon Potter<sup>5</sup>, Rathi Ravindrarajah<sup>5</sup>, Pamela Whittaker<sup>5</sup>, Claire Widden<sup>5</sup>, David Withers<sup>5</sup>, Panos Deloukas<sup>5</sup>; **(Cambridge):** Hin-Tak Leung<sup>2</sup>, Sarah Nutland<sup>2</sup>, Helen E Stevens<sup>2</sup>, Neil M Walker<sup>2</sup>, John A Todd<sup>2</sup> **Statistics (Cambridge):** Doug Easton<sup>12</sup>, David G Clayton<sup>2</sup>; **(Leicester):** Paul R Burton<sup>1</sup>, Martin D Tobin<sup>1</sup>; **(Oxford):** Jeffrey C Barrett<sup>3</sup>, David M Evans<sup>3</sup>, Andrew P Morris<sup>3</sup>, Lon R Cardon<sup>3</sup>; **(Oxford):** Niall J Cardin<sup>11</sup>, Dan Davison<sup>11</sup>, Teresa Ferreira<sup>11</sup>, Joanne Pereira-Gale<sup>11</sup>, Ingeleif B Hallgrimsdóttir<sup>11</sup>, Bryan N Howie<sup>11</sup>, Jonathan L Marchini<sup>11</sup>, Chris CA Spencer<sup>11</sup>, Zhan Su<sup>11</sup>, Yik Ying Teo<sup>3,11</sup>, Damjan Vukcevic<sup>11</sup>, Peter Donnelly<sup>11</sup> **PIs:** David Bentley<sup>5,54</sup>, Matthew A Brown<sup>48,49</sup>, Lon R Cardon<sup>3</sup>, Mark Caulfield<sup>38</sup>, David G Clayton<sup>2</sup>, Alistair Compston<sup>53</sup>, Nick Craddock<sup>23</sup>, Panos Deloukas<sup>5</sup>, Peter Donnelly<sup>11</sup>, Martin Farrall<sup>39</sup>, Stephen CL Gough<sup>50</sup>, Alistair S Hall<sup>26</sup>, Andrew T Hattersley<sup>42,43</sup>, Adrian VS Hill<sup>3</sup>, Dominic P Kwiatkowski<sup>3,5</sup>, Christopher G Mathew<sup>29</sup>, Mark I McCarthy<sup>3,7</sup>, Willem H Ouwehand<sup>8,9</sup>, Miles Parkes<sup>27</sup>, Marcus Pembrey<sup>18,20</sup>, Nazneen Rahman<sup>51</sup>, Nilesh J Samani<sup>10</sup>, Michael R Stratton<sup>51,52</sup>, John A Todd<sup>2</sup>, Jane Worthington<sup>40</sup>

**Affiliations:** 1 Genetic Epidemiology Group, Department of Health Sciences, University of Leicester, Adrian Building, University Road, Leicester, LE1 7RH, UK; 2 Juvenile Diabetes Research Foundation/Wellcome Trust Diabetes and Inflammation Laboratory, Department of Medical Genetics, Cambridge Institute for Medical Research, University of Cambridge, Wellcome Trust/MRC Building, Cambridge, CB2 0XY, UK; 3 Wellcome Trust Centre for Human Genetics, University of Oxford, Roosevelt Drive, Oxford OX3 7BN, UK; 4 Department of Psychological Medicine, Henry Wellcome Building, School of Medicine, Cardiff University, Heath Park, Cardiff CF14 4XN, UK; 5 The Wellcome Trust Sanger Institute, Wellcome Trust Genome Campus, Hinxton, Cambridge CB10 1SA, UK; 6 The Wellcome Trust, Gibbs Building, 215 Euston Road, London NW1 2BE, UK; 7 Oxford Centre for Diabetes, Endocrinology and Medicine, University of Oxford, Churchill Hospital, Oxford, OX3 7LJ, UK; 8 Department of Haematology, University of Cambridge, Long Road, Cambridge, CB2 2PT, UK; 9 National Health Service Blood and Transplant, Cambridge Centre, Long

Road, Cambridge, CB2 2PT, UK; 10 Department of Cardiovascular Sciences, University of Leicester, Glenfield Hospital, Groby Road, Leicester, LE3 9QP, UK; 11 Department of Statistics, University of Oxford, 1 South Parks Road, Oxford OX1 3TG, UK; 12 Cancer Research UK Genetic Epidemiology Unit, Strangeways Research Laboratory, Worts Causeway, Cambridge CB1 8RN, UK; 13 National Health Service Blood and Transplant, Sheffield Centre, Longley Lane, Sheffield S5 7JN, UK; 14 National Health Service Blood and Transplant, Brentwood Centre, Crescent Drive, Brentwood, CM15 8DP, UK; 15 The Welsh Blood Service, Ely Valley Road, Talbot Green, Pontyclun, CF72 9WB, UK; 16 The Scottish National Blood Transfusion Service, Ellen's Glen Road, Edinburgh, EH17 7QT, UK; 17 National Health Service Blood and Transplant, Southampton Centre, Coxford Road, Southampton, SO16 5AF, UK; 18 Avon Longitudinal Study of Parents and Children, University of Bristol, 24 Tyndall Avenue, Bristol, BS8 1TQ, UK; 19 Division of Community Health Services, St George's University of London, Cranmer Terrace, London SW17 0RE, UK; 20 Institute of Child Health, University College London, 30 Guilford St, London WC1N 1EH, UK; 21 University of Aberdeen, Institute of Medical Sciences, Foresterhill, Aberdeen, AB25 2ZD, UK; 22 Department of Psychiatry, Division of Neuroscience, Birmingham University, Birmingham, B15 2QZ, UK; 23 Department of Psychological Medicine, Henry Wellcome Building, School of Medicine, Cardiff University, Heath Park, Cardiff CF14 4XN, UK; 24 SGDP, The Institute of Psychiatry, King's College London, De Crespigny Park Denmark Hill London SE5 8AF, UK; 25 School of Neurology, Neurobiology and Psychiatry, Royal Victoria Infirmary, Queen Victoria Road, Newcastle upon Tyne, NE1 4LP, UK; 26 LIGHT and LIMM Research Institutes, Faculty of Medicine and Health, University of Leeds, Leeds, LS1 3EX, UK; 27 IBD Research Group, Addenbrooke's Hospital, University of Cambridge, Cambridge, CB2 2QQ, UK; 28 Gastrointestinal Unit, School of Molecular and Clinical Medicine, University of Edinburgh, Western General Hospital, Edinburgh EH4 2XU UK; 29 Department of Medical & Molecular Genetics, King's College London School of Medicine, 8th Floor Guy's Tower, Guy's Hospital, London, SE1 9RT, UK; 30 Institute for Digestive Diseases, University College London Hospitals Trust, London, NW1 2BU, UK; 31 Department of Gastroenterology, Guy's and St Thomas' NHS Foundation Trust, London, SE1 7EH, UK; 32 Department of Gastroenterology & Hepatology, University of Newcastle upon Tyne, Royal Victoria Infirmary, Newcastle upon Tyne, NE1 4LP, UK; 33 Gastroenterology Unit, Radcliffe Infirmary, University of Oxford, Oxford, OX2 6HE, UK; 34 Medicine and Therapeutics, Aberdeen Royal Infirmary, Foresterhill, Aberdeen, Grampian AB9 2ZB, UK; 35 Clinical Pharmacology Unit and the Diabetes and Inflammation Laboratory, University of Cambridge, Addenbrookes Hospital, Hills Road, Cambridge CB2 2QQ, UK; 36 Centre National de Genotypage, 2, Rue Gaston Cremieux, Evry, Paris 91057.; 37 BHF Glasgow Cardiovascular Research Centre, University of Glasgow, 126 University Place, Glasgow, G12 8TA, UK; 38 Clinical Pharmacology and Barts and The London Genome Centre, William Harvey Research Institute, Barts and The London, Queen Mary's School of Medicine, Charterhouse Square, London EC1M 6BQ, UK; 39 Cardiovascular Medicine, University of Oxford, Wellcome Trust Centre for Human Genetics, Roosevelt Drive, Oxford OX3 7BN, UK; 40arc Epidemiology Research Unit, University of Manchester, Stopford Building, Oxford Rd, Manchester, M13 9PT, UK; 41 Department of Paediatrics, University of Cambridge, Addenbrooke's Hospital, Cambridge, CB2 2QQ, UK; 42 Genetics of Complex Traits, Institute of Biomedical and Clinical Science, Peninsula Medical School, Magdalen Road, Exeter EX1 2LU UK; 43 Diabetes Genetics, Institute of Biomedical and Clinical Science, Peninsula Medical School, Barrack Road, Exeter EX2 5DU UK; 44 Centre for Diabetes and Metabolic Medicine, Barts and The London, Royal London Hospital, Whitechapel, London, E1 1BB UK; 45 Diabetes Research Group, School of Clinical Medical Sciences, Newcastle University, Framlington Place, Newcastle upon Tyne NE2 4HH, UK; 46 The MRC Centre for Causal Analyses in Translational Epidemiology, Bristol University, Canynge Hall, Whiteladies Rd, Bristol BS2 8PR, UK; 47 MRC Laboratories, Fajara, The Gambia; 48 Diamantina Institute for Cancer, Immunology and Metabolic Medicine, Princess Alexandra Hospital, University of Queensland, Woolloongabba, Qld 4102, Australia; 49 Botnar Research Centre, University of Oxford, Headington, Oxford OX3 7BN, UK; 50 Department of Medicine, Division of Medical Sciences, Institute of Biomedical Research, University of Birmingham, Edgbaston, Birmingham B15 2TT, UK; 51 Section of Cancer Genetics, Institute of Cancer Research, 15 Cotswold Road, Sutton, SM2 5NG, UK; 52 Cancer Genome Project, The Wellcome Trust Sanger Institute, Wellcome Trust Genome Campus, Hinxton, Cambridge CB10 1SA, UK; 53 Department of Clinical

*Neurosciences, University of Cambridge, Addenbrooke's Hospital, Hills Road, Cambridge CB2 2QQ, UK; 54  
PRESENT ADDRESS: Illumina Cambridge, Chesterford Research Park, Little Chesterford, Nr Saffron  
Walden, Essex, CB10 1XL, UK*
